# Supplementary material
Source: PubMed Central journal article supplement (PMC5206527)
Supplement: pnas.1615819114.sd01.pdf [file pnas.1615819114.sd01.pdf]

|       |   |                                                                                                       |        |                    |             |                          |        |   |                                                                                                                                          |
|-------|---|-------------------------------------------------------------------------------------------------------|--------|--------------------|-------------|--------------------------|--------|---|------------------------------------------------------------------------------------------------------------------------------------------|
| A6    | P | CAGCCCAATTTGGACTTCATCCGTGACTTCCATCAGCTAGTGAAGGCCCTACCCAGTATCAGCACTCCTTCATTCCAGT                       | 6/-6   | <i>A. baylyi</i>   | ACIAD1854   | 1854425-44               | -16.79 | 6 |                                                                                                                                          |
|       | R | CAGCCCAATTTGGACTTCATCCGTGACTTCCATCAGCTAGTGAAGGCCCTACCCAGTATCAGCACTCCTTCATTCCAGT                       | (0)    |                    |             | (20)                     |        |   |                                                                                                                                          |
|       | D | CACCAAAGACTAGATGCATCGATGGGTCATCACAGCATAGCAGGCCCTTTGTATCTACAACCTTGATAACATGCTGTT                        |        |                    |             |                          |        |   |                                                                                                                                          |
| O106  | P | ATCAGCTAGTGAAGGCC (41×N) TAGCTGGAGTATTTACCCCTATCCGCTTTTA-TCCATTAATAGAAAACAACCTCACTATTCAAACCTCAACACTTC | 16/-15 | <i>A. baylyi</i>   | ACIAD1581   | 1573321-46 <sup>e</sup>  | -15.21 | 1 | Frameshift, insertion of new start codon.                                                                                                |
|       | R | ATCAGCTAGTGAAGGCC (41×N) TAGCTGGAGTATTTACCCCTATCCGCTTTTAAATCATGAAAAGAAAACAACCTCACTATTCAAACCTCAACACTTC | (1)    |                    |             | (26)                     |        |   |                                                                                                                                          |
|       | D | TCTCTTGATCATTATTC (41×N) ATCTCATATGAGCCAGAAAATCCGTTTAAATCATGAAAAGAAAACAACCTCACTATTCAAACCTCAACACTTC    |        |                    |             |                          |        |   |                                                                                                                                          |
| NC5   | P | ACTACTCATCGAATCCTGCCCTACCTAAGCCTCACAGTGTGCCCCATCTAGCAACCAACATTATAGACTCAATTT                           | 5/-5   | <i>A. baylyi</i>   | <i>nirD</i> | 1901644-59               | -14.27 | 1 | Detection construct: <i>hisA</i> ::NC2.                                                                                                  |
|       | R | ACTACTCATCGAATCCTGCCCTACCTAAGCCTCACAGTGTGCCCCATCTAGCAACCAACATTATAGACTCAATTT                           | (0)    |                    |             | (16)                     |        |   |                                                                                                                                          |
|       | D | GCAATAATCATAAATAACAATACCGCCACGCTCACCTGTGCCCCATCTAGCAACCAACATTATAGACTCAATTT                            |        |                    |             |                          |        |   |                                                                                                                                          |
| R1517 | P | CAATTTGGACTTCATCCGTGACTTCCATCAGCTAGTGAAGGCCCTACCCAGTATCAGCACTCCTTCATTCCAG                             | 6/-6   | <i>A. baylyi</i>   | 16S rRNA    | (14) <sup>f</sup>        | -13.81 | 1 |                                                                                                                                          |
|       | R | CAATTTGGACTTCATCCGTGACTTCCATCAGCTAGTGAAGGCCCTACCCAGTATCAGCACTCCTTCATTCCAG                             | (0)    |                    | (7 copies)  |                          |        |   |                                                                                                                                          |
|       | D | GTTGCATCGAATTAACACATGCTCCACCCTGTGTGCGGCCCTGCAATTCATTGAGTTTAGTCTTGCG                                   |        |                    |             |                          |        |   |                                                                                                                                          |
| B18   | P | CCAATTTGGACTTCATCCGTGACTTCCATCAGCTAGTGAAGGCCCTACCCAGTATCAGCACTCCTTCATTCC                              | 4/-4   | <i>A. baylyi</i>   | <i>vanK</i> | 968658-70                | -12.91 | 1 | Mimicks double point mutation.                                                                                                           |
|       | R | CCAATTTGGACTTCATCCGTGACTTCCATCAGCTAGTGAAGGCCCTACCCAGTATCAGCACTCCTTCATTCC                              | (0)    |                    |             | (13)                     |        |   |                                                                                                                                          |
|       | D | TGGTCGCCGTTTACTGATTTTAAATTTGTTAGCTATTGCAAGGCATCAGCATGCTCGCCTGTGGTTTGGTGCAT                            |        |                    |             |                          |        |   |                                                                                                                                          |
| K86   | P | TCAGCCCAATTTGGACTTCATCCGTGACTTCCATCAGCTAGTGAAGGCCCTACCCAGTATCAGCACTCCTTCATTCC                         | 8/-8   | <i>A. baylyi</i>   | <i>lpxA</i> | 1378402-19 <sup>e</sup>  | -12.72 | 1 | Same donor gene as NC7 (different position and different detection construct).                                                           |
|       | R | TCAGCCCAATTTGGACTTCATCCGTGACTTCCATCAGCTAGTGAAGGCCCTACCCAGTATCAGCACTCCTTCATTCC                         | (0)    |                    |             | (18)                     |        |   |                                                                                                                                          |
|       | D | TCACAAATCATGTGCAATATGAGTATGCACTAGTGAAGGCCCTACCCAGTATCAGCACTCCTTCATTCC                                 |        |                    |             |                          |        |   |                                                                                                                                          |
| K49   | P | CAGCCCAATTTGGACTTCATCCGTGACTTCCATCAGCTAGTGAAGGCCCTACCCAGTATCAGCACTCCTTCATTCCAGTA                      | 6/-6   | <i>A. baylyi</i>   | <i>hisC</i> | 657687-707 <sup>e</sup>  | -12.55 | 5 | Right illegitimate crossover same as in A4 (class 2). Donor segment located in <i>hisC</i> of the <i>hisC</i> ::'ND5i' detection allele. |
|       | R | CAGCCCAATTTGGACTTCATCCGTGACTTCCATCAGCTAGTGAAGGCCCTACCCAGTATCAGCACTCCTTCATTCCAGTA                      | (0)    |                    |             | (21)                     |        |   |                                                                                                                                          |
|       | D | GTTTAAAGTAAGTTCTGGATTTAGGTTGCTCACAGGTACATAAGGCCTACTACGAACTCTGGACTCCAGAAACGCA                          |        |                    |             |                          |        |   |                                                                                                                                          |
| NC7   | P | CAACTACTACTCATCGAATCCTGCCCTACCTAAAGCCTCAC-TAGTAGCCAAATCTAGCAACCAACATTATAGACTCAATTTGAC                 | 10/-10 | <i>A. baylyi</i>   | <i>lpxA</i> | 1378697-720 <sup>e</sup> | -12.04 | 1 | Detection construct: <i>hisA</i> ::NC2. Same donor gene as K86 (detection construct: <i>hisC</i> ::'ND5i') but different position.       |
|       | R | CAACTACTACTCATCGAATCCTGCCCTACCTAAAGCCTCACGTAAAT-GCCTGAATCTAGCAACCAACATTATAGACTCAATTTGAC               | (0)    |                    |             | (24)                     |        |   |                                                                                                                                          |
|       | D | GTGTAAGTCCAGACTTATAAATTAATTTATGCTGCTGCTAAAT-GCCTGAATCTAGCAACCAACATTATAGACTCAATTTGAC                   |        |                    |             |                          |        |   |                                                                                                                                          |
| B127  | P | AGCCCAATTTGGACTTCATCCGTGACTTCCATCAGCTAGTGAAGGCCCTACCCAGTATCAGCACTCCTTCATTCCAGTA                       | 5/-5   | <i>B. subtilis</i> | <i>ybcI</i> | 210793-812               | -11.84 | 1 |                                                                                                                                          |
|       | R | AGCCCAATTTGGACTTCATCCGTGACTTCCATCAGCTAGTGAAGGCCCTACCCAGTATCAGCACTCCTTCATTCCAGTA                       | (0)    |                    |             | (20)                     |        |   |                                                                                                                                          |
|       | D | TATCAAAACAATCGTTGAGGTTAGTCGATATCAGCTAGTGAAGGCCCTAAGGATATTATCTTAAAAATAACCGGAGAAA                       |        |                    |             |                          |        |   |                                                                                                                                          |
| U96   | P | AGCCCAATTTGGACTTCATCCGTGACTTCCATCAGCTAGTGAAGGCCCTACCCAGTATCAGCACTCCTTCATTCC                           | 6/-6   | <i>A. baylyi</i>   | <i>recJ</i> | 3425419-33               | -11.38 | 1 |                                                                                                                                          |
|       | R | AGCCCAATTTGGACTTCATCCGTGACTTCCATCAGCTAGTGAAGGCCCTACCCAGTATCAGCACTCCTTCATTCC                           | (0)    |                    |             | (15)                     |        |   |                                                                                                                                          |
|       | D | CAGCTCTGGTTGACATTTGATGCGCCAGATCAGCAATTCAGGCTTAAAGCCGATC                                               |        |                    |             |                          |        |   |                                                                                                                                          |

|                         |                                                                                                                                                                                                                                                                                                                                                                                                                                                                         |                   |                                          |                                               |                                  |        |        |                                |   |
|-------------------------|-------------------------------------------------------------------------------------------------------------------------------------------------------------------------------------------------------------------------------------------------------------------------------------------------------------------------------------------------------------------------------------------------------------------------------------------------------------------------|-------------------|------------------------------------------|-----------------------------------------------|----------------------------------|--------|--------|--------------------------------|---|
| A71                     | P CAGCCCAATTTGGACTTCATCCGTGACTTC <b>CATCAGCTAGTGAAGGCC</b> CTACCCAGTATCAGCACTCCTTCATTCCA<br>     <br>R CAGCCCAATTTGGACTTCATCCGTGACTTC <b>CATCTTCAAGTCAAGGCC</b> CTACCCAGTATCAGCACTCCTTCATTCCA<br>     <br>D CCGTAGCAAGCTCTGCCAAAATATCGGGTA <b>CATCTTCAAGTCAAGGCC</b> AGTTGAGCTGAATATTTGACGCGTAGAAA                                                                                                                                                                      | 9/-9<br>(0)       | <i>A. baylyi</i>                         | <i>cysI</i>                                   | 2911491-508<br>(18)              | -11.31 | 3      |                                |   |
| K9                      | P AGCCCAATTTGGACTTCATCCGTGACTTC <b>ATCAGCTAGTGAAGCCCTACCC</b> AGTATCAGCACTCCTTCATTCCAGTACA<br>     <br>R AGCCCAATTTGGACTTCATCCGTGACTTC <b>ATCAGACCCGCTCATACCCTACCC</b> AGTATCAGCACTCCTTCATTCCAGTACA<br>     <br>P AATACTGAATTCGCCGGCGCAGAAACCAT <b>ATCAGACCCGCTCATACCCTACCT</b> CTACCAGCCGTGAGGCAAGCTGGTCAGGT                                                                                                                                                           | 10/-10<br>(0)     | <i>B. subtilis</i>                       | <i>mfd</i>                                    | 60904-27 <sup>e</sup><br>(24)    | -10.68 | 1      |                                |   |
| R13                     | P CCAATTTGGACTTCATCCGTGACTTC <b>AGCTAGTGAAGGCC</b> CTACCCAGTATCAGCACTCCTTCATTCC<br>     <br>R CCAATTTGGACTTCATCCGTGACTTC <b>AGCTATCGCAGGCC</b> CTACCCAGTATCAGCACTCCTTCATTCC<br>     <br>D GCTCAATGAGAACATTTCTCTTTTATTTTA <b>AGCTATCGCAGGCC</b> AAATTAATAAAAAATTCAGAATATGTACC                                                                                                                                                                                            | 4/-4<br>(0)       | <i>A. baylyi</i>                         | ACIAD3649                                     | 3567925-37 <sup>e</sup><br>(13)  | -10.38 | 1      |                                |   |
| A60                     | P CAATTTGGACTTCATCCGTGACTTC <b>AGCTAGTGAAGGCC</b> CTACCCAGTATCAGCACTCCTTCATTCC<br>     <br>R CAATTTGGACTTCATCCGTGACTTC <b>AGCTATTTAAGGCC</b> CTACCCAGTATCAGCACTCCTTCATTCC<br>     <br>D TTAGGCTATTTTATTTTAAATTTGCTTAGGCT <b>ATTTAAGGCC</b> TACAAAATAAATGAATCGATTTGCCAAAA                                                                                                                                                                                                | 3/-3<br>(0)       | <i>A. baylyi</i>                         | IR <sup>g</sup> ( <i>aroQ</i> /<br>ACIAD1740) | 1747656-67 <sup>e</sup><br>(12)  | -9.87  | 2      | Mimicks double point mutation. |   |
| K143                    | P CAATTTGGACTTCATCCGTGACTTC <b>AGCTAGTGAAGGCC</b> CTACCCAGTATCAGCACTCCTTCATTCCAG <sup>h</sup><br>     <br>R CAATTTGGACTTCATCCGTGACTTC <b>AGCTACCTTAGGACC</b> CTACCCAGTATCAGCACTCCTTCATTCCAG<br>     <br>D CGGGTCGGAACCTACCCGACAAGGAATTT <b>AGCTACCTTAGGACC</b> GTTATAGTTACGGCCGCCGTTTACTGGGGC                                                                                                                                                                           | 8/-8<br>(0)       | <i>B. subtilis</i> /<br><i>A. baylyi</i> | 23S rRNA<br>(10 and 7<br>copies)              | (14) <sup>i</sup>                | -4.46  | 1      |                                |   |
| b) Class 2 SPDIR events |                                                                                                                                                                                                                                                                                                                                                                                                                                                                         |                   |                                          |                                               |                                  |        |        |                                |   |
| O140                    | P GGTCTT <b>CTCT-FAGCC</b> TCAGCAGGAAAATCAGCCCAATTTGGACTTCATCCGTGACTTCATCAGC <b>TAGTGA</b> AGGCC (76×N) TAAT <b>AGAAAACAACC</b> TCACTATTCAA<br>     <br>R GGTCTT <b>CTCT-FAGCC</b> CCAACAGGTTAGCC----- <b>AGAAAACAACC</b> TCACTATTCAA<br>     <br>D GTAGGG <b>CTCTA-FAGCC</b> CCAACAGGTTAGCC----- <b>AGAAAACAACC</b> ACCTCAGTTAT                                                                                                                                        | 14/-143<br>(-129) | <i>A. baylyi</i>                         | IR<br>(ACIAD1855/<br>ACIAD1856)               | 1855272-306<br>(35)              | -17.87 | -14.05 | -31.92                         | 7 |
| A17                     | P AGCCCAATTTGGACTTCATCCGTGACTTC <b>ATCAGCTAGTGAAGCCCTACCCCA</b> GTATCAGCACTCCTTCATTCCAGTACAATAGTTATAGCTGG<br>     <br>R AGCCCAATTTGGACTTCATCCGTGACTTC <b>ATCAGCT--TGAAG-----CCGTGTATCAGCACT</b> CCTTCATTCCAGTACAATAGTTATAGCTGG<br>     <br>D GGCACTTTGTTCGCCGTGATATACCCGAT <b>ATCAGCT--TGAAG-----CCGTGTATCAGCACT</b> GGCTGGCAAACGTATTGTGAACCGCCAG                                                                                                                       | 9/-18<br>(-9)     | <i>A. baylyi</i>                         | ACIAD2174                                     | 2152597-623 <sup>e</sup><br>(27) | -13.48 | -15.82 | -29.30                         | 1 |
| B45                     | P GCCCAATTTGGACTTCATCC <b>GTGACTTCCAT</b> CAGCTAGTGAAGGCCCTACCCAGTATCAGC (90×N) AACAACCTCACTATTCAAAC <b>TTCAACACTTCT</b> GGTTCTGGC<br>     <br>R GCCCAATTTGGACTTCATCC <b>GTGACTTCCAT</b> GTTCATCCAT----- <b>TTCAACACTTCT</b> GGTTCTGGC<br>     <br>D TCATTTTTTGTATCTTT <b>GTGACTTCCAT</b> GTTCATCCAT----- <b>TTCAACACTTCT</b> TCACGCTCG                                                                                                                                 | 16/-127<br>(-111) | <i>B. subtilis</i>                       | <i>ipk</i>                                    | 541025-57 <sup>e</sup><br>(33)   | -11.62 | -15.59 | -27.21                         | 1 |
| O59                     | P TCTTAGCCTC <b>AGCAGG</b> AAATCAGCCCAA--TTGGACTTCATCCGTGACTTCCA-TCAGC <b>TAGTGA</b> AGGCCCTACCC-CAGTATCAGCACTCCTTCAT--- <b>CCAGTACAAT</b> AGTTATAGCT<br>     <br>R TCTTAGCCTC <b>AGCAGG</b> CAAGCCAGCATTATCTTTATAACGGAT-CTTGA--TCCAGTCATC-----GGCCAGCCACAGCA-CCAAACACCACCATAACAC <b>CCAGTACAAT</b> AGTTATAGCT<br>     <br>D ACTTTTTCGC <b>AGCAGG</b> CAAGCCAGCATTATCTTTATAACGGAT-CTTGA--TCCAGTCATC-----GGCCAGCCACAGCA-CCAAACACCACCATAACAC <b>CCAGTACAAT</b> CCAGACATAA | 77/-80<br>(-3)    | <i>A. baylyi</i>                         | <i>mraY</i>                                   | 3271835-927<br>(93)              | -14.28 | -11.97 | -26.25                         | 1 |

|       |                                                                                                                                                                                                                                                                                                                                                                                        |                  |                  |             |                                 |        |        |        |   |                                                                                                                                 |
|-------|----------------------------------------------------------------------------------------------------------------------------------------------------------------------------------------------------------------------------------------------------------------------------------------------------------------------------------------------------------------------------------------|------------------|------------------|-------------|---------------------------------|--------|--------|--------|---|---------------------------------------------------------------------------------------------------------------------------------|
| K2    | P ACTACTAGGCTTCTCTTAGCCTCAGCAGGAAAATCAGCCCAATTTGGACTTCATCCGTGACTTCCATCAGCTAGTGAAGGCCCTACCCAGTATCAGCACTCCTTCATTCCAGTACAATAGTT<br>R ACTACTAGGCTTCTCTTAGCCTCAGCAGGCA-----TTACTCCATG--TACCA-CACCTG-----CAATATCAGCACTCCTTCATTCCAGTACAATAGTT<br>D ACGATAAGCTGCTGCTGCCCTCAGCAGGCA-----TTACTCCATG--TACCA-CACCTG-----CAATATCAGCACTACAACAATTGAACTAATCTACGC                                       | 26/-62<br>(-36)  | <i>A. baylyi</i> | ACIAD3425   | 3340507-54<br>(48)              | -11.83 | -14.33 | -26.16 | 2 |                                                                                                                                 |
| R19   | P ACTAGGCTTCTCTTAGCCTCAGCAGGAAAATCAGCCCAATTTGGACTTCATCCGTGACTTCCATCAGCTAGTGAAGGCCCTACCCAGTATCAGCACTCCTTCATTCCAGTACAATAGTTATAG<br>R ACTAGGCTTCTCTTAGCCTCAGCAGGAAA-----GATTGCAT--TAAATT-----TACCAGCACTCCTTCATTCCAGTACAATAGTTATAG<br>D GCATGCAGTCGTTGGTACGCAGCAGGAAA-----GATTGCAT--TAAATT-----TACCAGCAC--CTTCAGTGGATAGACTATACGCTGC                                                        | 17/-62<br>(-45)  | <i>A. baylyi</i> | ACIAD3309   | 3216622-59 <sup>e</sup><br>(38) | -13.79 | -11.82 | -25.61 | 1 |                                                                                                                                 |
| A78   | P CAGCCCAATTTGGACTTCATCCGTGACTTCATCAGCTAGTGAAGGCCCTACCCAGTATCAGCACTCCTTCATTCCAGTACAATAGTTATAGTGTG<br>R CAGCCCAATTTGGACTTCATCCGTGACTTCATCAGCCAGTA-----CAGTATCAACACCTTCATTCCAGTACAATAGTTATAGTGTG<br>D CTGGCAAAGCCCGTACATTTAACTGGCAATCATCAGCCAGTA-----CAGTATCAACACCTGTAATGATTGGCCAGAACGTGCTCGCC                                                                                           | 14/-26<br>(-12)  | <i>A. baylyi</i> | <i>ribD</i> | 247248-71 <sup>e</sup><br>(24)  | -11.59 | -12.31 | -23.90 | 2 |                                                                                                                                 |
| K22   | P ACTAGGCTTCTCTTAGCCTCAGCAGGAAAATCAGCCCAATTTGGACTTCATCCGTGACTTCCATCAGCTAGTGAAGGCCCTACCCAGTATCAGCACTCCTTCATTCCAGTACAATAGT<br>R ACTAGGCTTCTCTTAGCCTCAGCAGCCAAA-----TTACTCCATG--TACCA-CACCTG-----TATCAGCACTCCTTCATTCCAGTACAATAGT<br>D AAGCTGTGGCGAATTTTGGCAGCAGCCAAA-----TTACTCCATG--TACCA-CACCTG-----TATCAGCACTCACATAATAGATGGCCTTTG                                                      | 6/-63<br>(-57)   | <i>A. baylyi</i> | <i>htpG</i> | 317444-66 <sup>e</sup><br>(23)  | -9.32  | -14.19 | -23.51 | 1 |                                                                                                                                 |
| T69   | P ATCAGCCCAATTTGGACTTCATCCGTGACTTCCATCAGCTAGTGAAGGCCCTAC--CCCAGTATCAGCACTCCTTCATTCCAGTACAATAGTTATAGTGGAGT<br>R ATCAGCCCAATTTGGACTTCATCCGTGACTTCCATCAGCAAAATTCAG-ACAAGCAATGAGTACCAATCTCCTTCATTCCAGTACAATAGTTATAGTGGAGT<br>D CGTAATAAAGCGACTTCACGTCGACGCTCAATCCAGCAAAATTCAG-ACAAGCAATGAGTACCAATCTCCTGACACCCCAAGACTGCCAGTATCGTA                                                           | 27/-27<br>(0)    | <i>A. baylyi</i> | ACIAD1059   | 1055406-47 <sup>e</sup><br>(42) | -12.00 | -11.31 | -23.31 | 1 |                                                                                                                                 |
| R159  | P GGTCTTCTCTTAGCCTCAGCAGGAAAATCAGCCCAATTTGGACTTCATCCGTGACTTCCATCAGCTAGTGAAGGCCCTACCCAGTATCAGCACTCCTTCATTCCAGTACAATAG<br>R GGTCTTCTCTTAGCCTCAGCAGGAAAATCAGGC-----TCAACAATCAA-TCCATCA-----AACACTTAATC--GTACCAGCACTCCTTCATTCCAGTACAATAG<br>D GAAAACGTCAACGCTGTACGAGTAAAATCAGGC-----TCAACAATCAA-TCCATCA-----AACACTTAATC--GTACCAGCACTGGTATCAAACGGATGTTTTCAG                                 | 36/-57<br>(-21)  | <i>A. baylyi</i> | ACIAD2154   | 2137307-60<br>(54)              | -11.36 | -11.59 | -22.95 | 1 | Same donor gene as R6 but different position.                                                                                   |
| R1522 | P AGCCCAATTTGGACTTCATCCGTGACTTCCATCAGCTAGTGA---AG---GCCCTACCCAGTATCAGCACTCCTTCATTCCAGTACAATAGTTATAGCTGG<br>R AGCCCAATTTGGACTTCATCCGTGACTTCCATCAGCAAGTGGACAGATTGCCAAAC---AGTATCTGCACCTCCTTCATTCCAGTACAATAGTTATAGCTGG<br>D TAGCATTTTGTGCTCCTTGGCTCATTTGGCATCAGCAAGTGGACAGATTGCCAAAC---AGTATCTGCACCTTGTGCTTTTGGGTACCAGGTTTATGTTT                                                          | 28/-25<br>(3)    | <i>A. baylyi</i> | ACIAD2761   | 2700433-71 <sup>e</sup><br>(39) | -10.41 | -11.91 | -22.32 | 1 |                                                                                                                                 |
| E11   | P AGCAGGAAAATCAGCCCAATTTGGACTTCATCCGTGACTTCCATCAGCTAGTGAAGGCCCTACCCAGTATCAG (70×N) AAACAACCTCAGTATTCAACCTTCAACACTTCTGTTCTG<br>R AGCAGGAAAATCAGCCCAATTTGGACTTCATCCGTGACTTCCATCAGCTAGTGAAGGCCCTACCCAGTATCAG (70×N) AAACAACCTCAGTATTCAACCTTCAACACTTCTGTTCTG<br>D AAACCTTTTATCAGCCCAATTTGGACTTCATCCGTGACTTCCATCAGCTAGTGAAGGCCCTACCCAGTATCAG (70×N) AAACAACCTCAGTATTCAACCTTCAACACTTCTGTTCTG | 0/-150<br>(-150) | <i>A. baylyi</i> | <i>pepN</i> | 2000415-35<br>(21)              | -5.84  | -16.17 | -22.01 | 1 | Mimicks MH-free deletion.                                                                                                       |
| S80   | P TTGAGATAGAAAGATGAACACTACACTCCCACTAGTAGGCTTCTCTTAGCCTCAG (40×N) ATCAGCTAGTGAAGGCC (15×N) ACTCCTTCATTCCAGTACAATAGTTATAGCTGGAGTA<br>R TTGAGATAGAAAGATGAACACTACACTCCCACTAG-----TTACTCCATG--TACCA-CACCTG-----CCAGTACAATACTTCATTCCAGTACAATAGTTATAGCTGGAGTA<br>D TCTAAATTAATGCTGAAACTATAAAGCACCATTAG-----TTACTCCATG--TACCA-CACCTG-----CCAGTACAATACTTCATTCCAGTACAATAGTTATAGCTGGAGTA          | 0/-105<br>(-105) | <i>A. baylyi</i> | <i>ggt</i>  | 913145-77 <sup>e</sup><br>(33)  | -8.70  | -13.08 | -21.78 | 1 | Mimicks MH-free deletion. Left MH contains a stop codon (italics) not acquired with the observed (highlighted) crossover joint. |
| R1520 | P TCAGCAGGAAAATCAGCCCAATTTGGACTTCATCCGTGACTTCCATCAGCTAGTGAAGGCCCTACCCAGTATCAGCACTCCTTCATTCCAGTACAATAG<br>R TCAGCAGGAAAATCAGCCCAATTTGGACTTCATCCGTGACTTCATCCAGTAAAGTCCAGCC-CAAAAT-AATACCCTGCCAGTATCAGCACTCCTTCATTCCAGTACAATAG<br>D GCGCCAGATCTGCAATCCGACCAATACCATCCGAGCCAGTAAAGTCCAGCC-CAAAAT-AATACCCTGCCAGTATCAGCACTCCTTCATTCCAGTACAATAG                                                | 31/-28<br>(3)    | <i>A. baylyi</i> | <i>cycA</i> | 118908-50 <sup>e</sup><br>(43)  | -7.08  | -14.65 | -21.49 | 1 |                                                                                                                                 |





|       |   |                                                                                                                                                                   |        |                  |                     |                         |        |        |        |     |                                                                                                                                              |
|-------|---|-------------------------------------------------------------------------------------------------------------------------------------------------------------------|--------|------------------|---------------------|-------------------------|--------|--------|--------|-----|----------------------------------------------------------------------------------------------------------------------------------------------|
| R7    | P | AGCCCAATTGGACTTCATCCGTGACTTCCATCA <b>AGCTAGTGA</b> AGGCCCTACCC <b>CAGTATCAGCAC</b> TCTTCATTCCAGTACAATAGTTATAGCTG                                                  | 20/-23 | <i>A. baylyi</i> | ACIAD0133           | 137897-928 <sup>e</sup> | -2.89  | -13.67 | -16.56 | 1   |                                                                                                                                              |
|       | R | AGCCCAATTGGACTTCATCCGTGACTTCCATCA <b>CCCACTTCT</b> ---CATGTT <b>GCAGCATCAGCAC</b> TCTTCATTCCAGTACAATAGTTATAGCTG                                                   | (-3)   |                  |                     | (32)                    |        |        |        |     |                                                                                                                                              |
|       | D | ACGTTTGGATCAGGAACACCAGCAAAAGATCA <b>CCCACTTCT</b> ---CATGTT <b>GCAGCATCAGCAC</b> CCAATGTCTGATTACTGGGCATATTGCT                                                     |        |                  |                     |                         |        |        |        |     |                                                                                                                                              |
| K6    | P | CAGCCCAATTGGACTTCATCCG <b>TGACTTCCAT</b> CAG <b>CTAGTGA</b> AGGCCCTACCCAGTATCAGCACTCCT (65×N) ACAACCTCACTATTCAAACCTCAACAC <b>TTCTG</b> TTTCTGGCTCTA               | 0/-129 | <i>A. baylyi</i> | ACIAD3429           | 3346647-61 <sup>e</sup> | -12.64 | -3.61  | -16.25 | 1   | Mimicks MH-free deletion.                                                                                                                    |
|       | R | CAGCCCAATTGGACTTCATCCG <b>TGACTTCCAT</b> ----- <b>TTCTG</b> TTTCTGGCTCTA                                                                                          | (-129) |                  |                     | (15)                    |        |        |        |     |                                                                                                                                              |
|       | P | TTCATTCTTCAAAAATTCCTGTT <b>TGACTTCCAT</b> ----- <b>TTCTG</b> CAATGGTATCTC                                                                                         |        |                  |                     |                         |        |        |        |     |                                                                                                                                              |
| O100  | P | AGGAAAATCAGCCCAATTGG <b>GACTTCA</b> TCCGTGACTTCCA--TCAGCT-- <b>AGTGA</b> AGGCCCTAC--CCAGTATCAGCACT <b>CCTTCA</b> TTCCAGTACAATAGTTATAGCTG                          | 42/-48 | <i>A. baylyi</i> | <i>fkfB</i>         | 62738-95                | -8.63  | -6.46  | -15.09 | 1   |                                                                                                                                              |
|       | R | AGGAAAATCAGCCCAATTGG <b>GACTTCA</b> --CCAT-AC-GCAAGTTTGGCTGGAATAAAA---CAGACGCGCTTTTCA--- <b>CCTTCT</b> TTCCAGTACAATAGTTATAGCTG                                    | (-6)   |                  |                     | (58)                    |        |        |        |     |                                                                                                                                              |
|       | P | CCAATCGCATCACCGCTAC <b>GACTTCA</b> --CCAT-AC-GCAAGTTTGGCTGGAATAAAA---CAGACGCGCTTTTCA--- <b>CCTTCT</b> TTCCAGTATGCAAGCCTTCGGT                                      |        |                  |                     |                         |        |        |        |     |                                                                                                                                              |
| Total |   | 60 different SPDIR events found.                                                                                                                                  |        |                  |                     |                         |        |        |        | 128 |                                                                                                                                              |
| DIR1  | P | TCAGCT <b>AGTGA</b> AGGCC (69×N) TTTATCCAT <b>T</b> ----- <b>A</b> ATAGAAAACAA (24×N) TCTGGTTCTGGCTCTAATGTC                                                       | 92/0   | <i>A. baylyi</i> | <i>hisC::'ND5i'</i> | 657587-637 +            | >0.00  | >0.00  | >0.00  | 1   | DIR isolate (see SI). Formed by two IR events without MH and resulted in a duplication of a neighboring segment (interrupted direct repeat). |
|       | R | TCAGCT <b>AGTGA</b> AGGCC (69×N) TTTATCCAT <b>T</b> AAGTCTCTACGGG (24×N) AATAGAAAGATGAAACACTAC (24×N) AGCCTCAGC <b>A</b> ATAGAAAACAA (24×N) TCTGGTTCTGGCTCTAATGTC | (92)   |                  |                     | insert down-stream (94) |        |        |        |     |                                                                                                                                              |
|       | D | GTATTGGCTCAACAGG (69×N) AGAGCTTAG <b>T</b> AAGTCTCTACGGG (24×N) AATAGAAAGATGAAACACTAC (24×N) AGCCTCAGC <b>A</b> GGAAAATCAGC (24×N) TCCATCAGCT <b>AGTGA</b> AGGCC  |        |                  |                     |                         |        |        |        |     |                                                                                                                                              |

<sup>a</sup> P: ancestral/parental DNA sequence; R: recombinant (microindel-containing) DNA sequence; D: donor DNA sequence of segment used for double IR; bold red: double stop codons; bold pink: simple or extended microhomologies as determined by  $\Delta G^0_{\text{min}}$ ; highlighted yellow: illegitimate recombination sites; underlined: start codons. <sup>b</sup> Nucleotides inserted/nucleotides deleted. <sup>c</sup> Nucleotide positions, including all MH annealing segments as determined by  $\Delta G^0_{\text{min}}$ , in annotated GenBank entries (*A. baylyi*: NC\_005966; *B. subtilis*: NC\_000964). <sup>d</sup> Simple or extended microhomology. <sup>e</sup> Reverse complement. <sup>f</sup> The seven positions are: 19331-44; 214116-29; 646953-66; 1661615-28 (all reverse complement); 2946435-48; 3075532-45; and 3563854-67. <sup>g</sup> Intergenic region. <sup>h</sup> The triple alignment was created with the *B. subtilis* donor DNA sequence. The *A. baylyi* donor sequence is identical in the shown section except for a G/A nucleotide difference 29 bp upstream of the MH (indicated in italics). <sup>i</sup> The ten positions in *B. subtilis* are: 13658-71; 34126-39; 94203-16; 100059-72; 164558-71; 170164-77; 175163-76; 639104-17; 950367-80 (all reverse complement); and 3174956-69; in *A. baylyi*, the seven positions are: 22446-59; 217231-44; 650158-71; 1664730-43 (all reverse complement); 2943230-43; 3072327-40; and 3560739-52.
