# Supplementary material
Source: PubMed Central journal article supplement (PMC5206527)
Supplement: pnas.1615819114.sd03.pdf [file pnas.1615819114.sd03.pdf]

|       |                                                                                                                                                                                                                                                                                                                                                                              |                |   |                 |               |                       |                        |                                            |        |                                                                      |
|-------|------------------------------------------------------------------------------------------------------------------------------------------------------------------------------------------------------------------------------------------------------------------------------------------------------------------------------------------------------------------------------|----------------|---|-----------------|---------------|-----------------------|------------------------|--------------------------------------------|--------|----------------------------------------------------------------------|
| Z2044 | P AGATTTAACATTCCTTTCTGTAATCTTCTGTCAGTCTTTTCCCTCAGCC <b>GAGACATATAATTAAGACCT</b> TAACCAAGCCTAACTTAATGCTTTGTTGAG<br>R AGATTTAACATTCCTTTCTGTAATCTTCTGTCAGTCTTTTCCCTCAGCC <b>GAGACAT-TAA-T-AGACCT</b> TAACCAAGCCTAACTTAATGCTTTGTTGAG<br>D TCTTATCAGCTATCTTAGACTGCTCTTAAACAATGATAAATGTAATTA <b>GAGACAT-TAA-T-AGACCT</b> CAGATGTAATCTTGTGGCTTAAGTATTAT                             | 4/-7<br>(-3)   | 1 | 1: 109295951-7  | <i>STXBP3</i> | Individual 3 (cancer) | NC_018913<br>AC_000134 | 16: 52515490-507 <sup>f</sup><br>(18)      | -15.86 |                                                                      |
| Z109  | P ATCGCAGGGAGCCAGCACCTGTGCCAGTCCCTGG <b>AGCTGCCACCCACCCACAGT</b> CAGTGTCTTCTGGCTGTGCACAGTGGCTGGACCCCATGTTCACTTGAT<br>R ATCGCAGGGAGCCAGCACCTGTGCCAGTCCCTGG <b>AGCTGCC-ACTGTGC-ACAGT</b> CAGTGTCTTCTGGCTGTGCACAGTGGCTGGACCCCATGTTCACTTGAT<br>D CCATGATTATCTGGGAGTTAGAATCCATAATA <b>AGCTGCC-ACTGTGC-ACAGT</b> GATTGTGTGCTGGTGGCTTTACATCTATTTTCTCATTTAATTCCT                     | 7/-9<br>(-2)   | 1 | 11: 111830181-9 | <i>DIXDC1</i> | Individual 1 (cancer) | -                      | 3: 186699709-27<br>(19)                    | -14.41 |                                                                      |
| Z2342 | P GATTTTCTAGGGTGTGGTGTGTCAGCATCCCTGCCTGCTACCC <b>CAGGGGATGTCAATAGTCTCT</b> TTTCAGTTGTGACCCCAATGTTATCCAAACTTGCCAAATGTC <sup>g</sup><br>R GATTTTCTAGGGTGTGGTGTGTCAGCATCCCTGCCTGCTACCC <b>CAGGG-ATGCTGG--GTCTCT</b> TTTCAGTTGTGACCCCAATGTTATCCAAACTTGCCAAATGTC<br>D GCATGTCTGGGGAGGAGAGGAGGCTTCTGTCTGGGAT <b>CAGGG-ATGCTGG--GTCTCT</b> AGGTGGTCTTATTAAGGAGTGTTTAACTGGCTACCCCTTG | 7/-10<br>(-3)  | 1 | 19: 57247132-41 | IR            | Individual 3 (cancer) | -                      | 3: 72166496-513<br>15: 57710360-77<br>(18) | -12.30 | Two possible donor molecules with the same thermodynamic properties. |
| Z248  | P TGAGGAGTCAGGAACCTGTGGATGGTGTGGACAGAGCAGGACAGGGCCCTG <b>GCTCAGGTGT--CCAGAGGCT</b> GGCCGTGGCCCTCCCTATGGGATCAGACT<br>R TGAGGAGTCAGGAACCTGTGGATGGTGTGGACAGAGCAGGACAGGGCCCTG <b>GCTCTGCCGCTGCCAGAGGCT</b> GGCCGTGGCCCTCCCTATGGGATCAGACT<br>D GGCTTCACGGAGAGAACCTGTGGAGCAGGGACAAAATGTCCAGGAGCC <b>GCTCTGCCGCTGCCAGGG</b> CGTTAAGACCTCCTGTCCCTTTCGTTTAA                           | 8/-6<br>(2)    | 1 | 19: 51362585-90 | <i>KLK3</i>   | Individual 1 (cancer) | NC_018930              | 14: 54430753-71 <sup>f</sup><br>(19)       | -11.83 |                                                                      |
| Z2151 | P TTTGTGCAGCTATTTCTCTTTACGCATTTTACT <b>AACTATCCATGCCGTGAAGAT</b> GGAGGAACAAAAGATGGGTAACAGTTAGCTAAGCAGCTGCTGCTGAAAAT<br>R TTTGTGCAGCTATTTCTCTTTACGCATTTTACT <b>AACTAA--ATGCCGT-AAGAT</b> GGAGGAACAAAAGATGGGTAACAGTTAGCTAAGCAGCTGCTGCTGAAAAT<br>D ACTTCCTATAAACATCTCAATCAATAACACAA <b>AACTAA--ATGCCGT-AAGA</b> GCCCTCCTCAATCTGTTACTCCCGTCTTCCCTATGCTCACATCTGGT                 | 1/-3<br>(-2)   | 1 | 13: 26744624-6  | <i>RNF6</i>   | Individual 3 (cancer) | AC_000146              | 15: 60554665-80<br>(16)                    | -11.10 |                                                                      |
| Z699  | P TGCCAGATGTTGTGGAAGGCAATAGAAAAGAAAA <b>TAAACAACAACAATAAACAACA</b> CAACAACAACAACCTAAATGCTCCAAGTTTGTAGAGGAACCTTAC<br>R TGCCAGATGTTGTGGAAGGCAATAGAAAAGAAAA <b>TAAACAACAACA--AACACA</b> CAACAACAACAACCTAAATGCTCCAAGTTTGTAGAGGAACCTTAC<br>D AAACAGCACAGGAACGAGTATGTTTTCAGCTAT <b>TAAACAACAACA--AACACA</b> ACCTGCCATGAAGGAATTATCTGGGTATCTGTAACCTTTTGT                             | 12/-14<br>(-2) | 1 | 3: 77712076-89  | IR            | Individual 1 (blood)  | -                      | 5: 14619566-86 <sup>f</sup><br>(21)        | -10.22 |                                                                      |
| Z1899 | P CTAACCTTAGTGAGATAACACTGATGAAAGAGTCTCT <b>AGGTAATGGCCGGGGGGGGCAAC</b> AGCATACTTTTCCAGAGAAGGAACATAGCTCTAAGTCTCCA<br>R CTAACCTTAGTGAGATAACACTGATGAAAGAGTCTCT <b>AGGTAATGG-A-GG-GGGG-GAAC</b> AGCATACTTTTCCAGAGAAGGAACATAGCTCTAAGTCTCCA<br>D TGGGACCAGGAGACAGGACTAGGATGAGGGGGGGGG <b>AGGATATGG-A-GG-GGGG-GAAC</b> GAGGGGCATGAGCTGGTGGGGCATGGACTGGCAAGAGGG                      | 7/-11<br>(-4)  | 1 | 4: 135862829-39 | IR            | Individual 2 (blood)  | NC_018916              | 1: 155064573-92<br>(20)                    | -9.40  |                                                                      |
| Z640  | P GAGGTGTGCCTGTGGCTGGCATCCTGTGGGGATATCTACAGGGAAGCCCCAG <b>TGTGGGGC-A-AGAGGC</b> CCACAGCTGGGGCCTGGGGAGGCACCTCAGAC<br>R GAGGTGTGCCTGTGGCTGGCATCCTGTGGGGATATCTACAGGGAAGCCCCAG <b>TGTGGCCCTGGGGAGGC</b> CCACAGCTGGGGCCTGGGGAGGCACCTCAGAC<br>D GGAGAGCTGGGTGAAAAGGCCCTGAAGGTCTGGAAGGTCTCTGGGACC <b>TGTGGCCCTGGGGAGGC</b> ATGGAGGGCAGTTGGCAGGTTAGGAATGTGG                          | 7/-5<br>(2)    | 1 | 2: 240596941-5  | IR            | Individual 1 (blood)  | -                      | 22: 30119257-73<br>(17)                    | -8.63  |                                                                      |
| Z613  | P AAGAGGGTGGCCTTCCATTAAAGACCAGTGAATGATACA <b>GAAAGTGAAGAACCTTGTTCAG</b> ATAGCCGTGATAATATAATGTTATAAAATCTTCATCTTTCTGT<br>R AAGAGGGTGGCCTTCCATTAAAGACCAGTGAATGATACA <b>GAAAGTGAAGAAC--TGCTGTTCAG</b> ATAGCCGTGATAATATAATGTTATAAAATCTTCATCTTTCTGT<br>D GGAACCAATTATATCTGTTTATTCAATTTATTGTAAG <b>GAAAGTGAAGAAC--TGCTGTTCAG</b> TCTCTGAAGAGTCTGGGTTAGTAAAGAAAGTAAAGATCCAAGCC       | 7/-9<br>(-2)   | 1 | 11: 98185084-92 | IR            | Individual 1 (blood)  | NC_018923<br>AC_000144 | 17: 3088497-514 <sup>f</sup><br>(18)       | -8.13  |                                                                      |

|                         |                                                                                                                                                                                                                                                                                                                                    |               |   |                 |                              |                                               |                        |                                       |        |        |        |                                                                              |
|-------------------------|------------------------------------------------------------------------------------------------------------------------------------------------------------------------------------------------------------------------------------------------------------------------------------------------------------------------------------|---------------|---|-----------------|------------------------------|-----------------------------------------------|------------------------|---------------------------------------|--------|--------|--------|------------------------------------------------------------------------------|
| Z60                     | P AAGACACATCTGAGAAACAGGGACGCTCGAGAAGCTAGAGACCACCAGTCTACACGGAGGTCCTCCAGTCCATGAGGTCAAAAAGAGTCCCCAACCCCTC<br>R AAGACACATCTGAGAAACAGGGACGCTCGAGAAGCTAGAGAGGGGGAGTCTACACGGAGGTCCTCCAGTCCATGAGGTCAAAAAGAGTCCCCAACCCCTC<br>D CACCCATATGCAGAGCTCAGCAAGAGGACCTCCAGAGAGGGAGTCCAGAAAGCCATTACAAAGGGTATTTATGAGTGGCAACGTGAAAGTAC                 | 6/-6<br>(0)   | 1 | 10: 13919477-82 | FRMD4A                       | Individual 1 (cancer)                         | -                      | 14: 68987918-33<br>(16)               | -5.68  |        |        |                                                                              |
| Z2442                   | P GCCTTATTTGAGAAATTTGCAAAAGCGGTAAT-CATAT-ATTTACCCCTGTATTATAATAATATATTTTCTCTTCTCCTGAGTGTGATGTGCTGCAACT<br>R GCCTTATTTGAGAAATTTGCAAAAGCGGTAATAATATATTTTACCCCTGTATTATAATAATATATTTTCTCTTCTCCTGAGTGTGATGTGCTGCAACT<br>D GGCTAAGAATAGTTTACCATTCACTTGGTAAATATATTTTCTTTTATTTCTGGACCATAAGTGTCTTTTCTTCCATCATTAGGTTATTACAAAT                  | 8/-6<br>(2)   | 1 | 3: 93865324-9   | IR                           | Individual 3 (cancer)                         | -                      | 2: 198742290-307 <sup>f</sup><br>(18) | -5.15  |        |        |                                                                              |
| Z422                    | P GGTCAATTTGATCCTTGGCTCACTGGCATCTCTGTAGATTTTTCATGTATACAATCTTCAATC-TGATGTGCAAGGTAATCCATCTTGCAAAAGGATTTGATG<br>R GGTCAATTTGATCCTTGGCTCACTGGCATCTCTGTAGATTTTTCATGTATACAATCTTCAATCATCAGATTGAAGGTAATCCATCTTGCAAAAGGATTTGATG<br>D ACCCAGCCAGCTTCTTCTCACTGTCAATTTTACCATAGAAAACAGGACTCCAAAATCATCAGATTGAAGGAAAGATCACACAAGGAATATAAGTTGC      | 9/-8<br>(1)   | 1 | 6: 29788849-56  | IR                           | Individual 1 (cancer)                         | AC245553               | 2: 128624973-89 <sup>f</sup><br>(17)  | -4.73  |        |        |                                                                              |
| Z287                    | P TCTTTTCTCTCTAGCCTTTTCTAAATGTAGGTTAATCAATACCAAGTTGAAATGTGAAGTGGCTTAAATTTTTCACAAATATTCAATAACACAT<br>R TCTTTTCTCTCTAGCCTTTTCTAAATGTAGGTTAATCAACATGTGAATTTGAAATGTGAAGTGGCTTAAATTTTTCACAAATATTCAATAACACAT<br>D TTAGGAGAACTAATATAATGCTATTACACATTTTATCAACATGTGAATTTGAAATATACCATGAAAATTTCTGCTCTTCTGAGCTGACCTTTAATTG                      | 8/-8<br>(0)   | 1 | 20: 7175140-7   | IR                           | Individual 1 (cancer)                         | NC_018932<br>AC_000153 | 15: 37749877-94<br>(18)               | -4.47  |        |        |                                                                              |
| b) Class 2 SPDIR events |                                                                                                                                                                                                                                                                                                                                    |               |   |                 |                              |                                               |                        |                                       |        |        |        |                                                                              |
| Z317                    | P CATTTCACAGGTGAGAACTGAGGTTCCGGGCTGTGAGAAAGACTTCTCTTAAAACAAGTCTTCTGACTTCAAGGACAGTATTCTTTTCACTACCCAAACC<br>R CATTTCACAGGTGAGAACTGAGGTTCCGGGCTGTGAGAAAGACTTCTCTTAAAACAAGTCTTCTGACTTCAAGGACAGTATTCTTTTCACTACCCAAACC<br>D AGGGTTGGGTAGTGAAGAATACTGTCTTGAATGTCAGAAAGACTTCTCTTAAAACAAGTCTTCTGACTTCAAGGACAGTATTCTTTTCACTACCCAAACC         | 8/-8<br>(0)   | 1 | 3: 31871027-34  | OSBPL10                      | Individual 1 (cancer)                         | -                      | 3: 31871014-47 <sup>f</sup><br>(34)   | -17.62 | -17.62 | -35.24 | Microinversion.                                                              |
| Z2579                   | P CCTGGGATCTTTTACAGCCAAAGTGGGCGGCTGTG-TGGGCACTGAGTTTCCCG-----TCACTGCCAGTGTCCAGCACAGCCTGGAGACTCCACAGC<br>R CCTGGGATCTTTTACAGCCAAAGTGGGCGGCTGTG-TGGGCACTGAGTTTCCCG-----TCACTGCCAGTGTCCAGCACAGCCTGGAGACTCCACAGC<br>D TGGCAGCACCATGGGCTGGGAGTCTCCAGGCTGTG-TGGGCACTGAGTTTCCCG-----TCACTGCCAGTGTCCAGCACAGCCTGGGCTGTGAAAGAA               | 25/-19<br>(6) | 1 | 6: 41397918-36  | IR                           | Individual 3 (cancer)                         | -                      | 6: 41397917-57 <sup>f</sup><br>(41)   | -23.37 | -7.64  | 31.01  | Microinversion (misannealed at right MH, resulting in a total net DNA gain). |
| Z2949                   | P TCTGGCTCGTGGTGGCCTTACAGCAATGGTGCAGGGACTGCTGTGGGGCTGGGTGAGGGTGACGGCTGAGGAGAGTGGTGGCCCTAGGAGCCCTCACCAGCAAG<br>R TCTGGCTCGTGGTGGCCTTACAGCAATGGTGCAGGGACTGCTGTGGGGCTGGGTGAGGGTGACGGCTGAGGAGAGTGGTGGCCCTAGGAGCCCTCACCAGCAAG<br>D AGTCATTTCTTCCAGAGTCTCATGGTGCAGGGACTGCTGTGGGGCTGGGTGAGGGTGACGGCTGAGGAGAGTGGTGGCCCTAGGAGCCCTCACCAGCAAG | 6/-12<br>(-6) | 1 | 7: 76634269-80  | UPK3B                        | Individual 3 (blood)                          | -                      | 1: 36582933-50 <sup>f</sup><br>(18)   | -18.25 | -12.33 | -30.61 |                                                                              |
| Z457                    | P AAATGACCTTTTACCAGATAGTCTGACTGCTGGGAGGTGGTGGGCGTGCATGGAGAGGTCCTGGGAGTTGAGTGAAGAAGCTGTGTC<br>R AAATGACCTTTTACCAGATAGTCTGACTGCTGGGAGGTGGTGGGCGTGCATGGAGAGGTCCTGGGAGTTGAGTGAAGAAGCTGTGTC<br>D CCTAGTCTTTTGGCCGTATGATTATGTAGGTTGAGGTGGTGGGCGTGCATGGAGAGGTCCTGGGAGTTGAGTGAAGAAGCTGTGTC                                                 | 9/-5<br>(4)   | 1 | 7: 36200288-92  | EEPDI                        | Individual 1 (cancer)                         | -                      | 15: 88587801-25 <sup>f</sup><br>(25)  | -20.83 | -9.77  | -30.60 |                                                                              |
| Z2340                   | P TTGCTTACACAAATGAACTACAGGCTGTAGCTCACATGAAAGACTACAGCTCATCTGTGTGTGACAAATGGCAGGATTTTGAAGGCTGAAACATGT<br>R TTGCTTACACAAATGAACTACAGGCTGTAGCTCACATGAAAGACTACAGCTCATCTGTGTGTGACAAATGGCAGGATTTTGAAGGCTGAAACATGT<br>D CCATTTGTGACAAACAGATAGGCTGTAGCTCACATGAAAGACTACAGCTCATCTGTGTGTGACAAATGGCAGGATTTTGAAGGCTGAAACATGT                       | 7/-7<br>(0)   | 2 | 19: 56505148-54 | IR (between NLRP8 and NLRP5) | Individual 3 (cancer)<br>Individual 3 (blood) | -                      | 19: 56505136-66 <sup>f</sup><br>(31)  | -14.57 | -14.57 | -29.14 | Microinversion.                                                              |

|       |                                                                                                                                                                                                                                                                                                                                                  |               |   |                 |                                       |                                               |                                  |                                      |        |        |        |                 |
|-------|--------------------------------------------------------------------------------------------------------------------------------------------------------------------------------------------------------------------------------------------------------------------------------------------------------------------------------------------------|---------------|---|-----------------|---------------------------------------|-----------------------------------------------|----------------------------------|--------------------------------------|--------|--------|--------|-----------------|
| Z1099 | P ATTACTAGTTTTAGCAATTTTAAAGCCCTATGTGATACAAATTTCTAACAGCAATTACAGTTTTCTTTTATACAGTCAAATATGTTACAGTATCTGTACTGACTT<br>R ATTACTAGTTTTAGCAATTTTAAAGCCCTATGTGATACAAATTTCTAACAGCAATTACAGTTTT-----ATCCAGTCAAATATGTTACAGTATCTGTACTGACTT<br>D CTAAGGAGAAAATATTCTTAGACTATTTTCATGCTGTAAATCTCTACAGATTTACAGTTTT-----ATCCAGTCAAATTAATGCAAACCCCAATGCAAGCATT          | 3/-8<br>(-5)  | 1 | 3: 158067355-62 | <i>RSRC1</i>                          | Individual 2 (cancer)                         | NC_018914                        | 14: 57051594-626<br>(33)             | -14.08 | -12.74 | -26.81 |                 |
| Z441  | P TGCTGACTTTTCCCGGGTACACTTCTCTCATCTCCCTTGGTGGCTGCGACTTTGCCACCAAGTTTCGAGTTTCTCTCCTTTATGTGCACTCTGTGCA<br>R TGCTGACTTTTCCCGGGTACACTTCTCTCATCTCCCTTGGTGGCAAGTCGCAAGCCACCAAGTTTCGAGTTTCTCTCCTTTATGTGCACTCTGTGCA<br>D CTGCACAGAGTGCACATAAAGGAGAAAGAACTCGAAACTTGGTGGCAAGTCGCAAGCCACCAAGGGAGATGAGAGAAGTGTGACCCGGGAAAGTCAAGC                              | 9/-9<br>(0)   | 1 | 6: 148769673-81 | <i>SASH1</i>                          | Individual 1 (cancer)                         | -                                | 6: 148769664-90 <sup>f</sup><br>(27) | -13.05 | -13.05 | -26.10 | Microinversion. |
| Z1405 | P AACACAATAATATAAAATAGACCAGTTAATAACCCCAACAATGACTTCTGGTATTCAAGTGAAGAAAGAGAGTCACATGTCTCTCTTAACTCAGAAACTCAAATAG<br>R AACACAATAATATAAAATAGACCAGTTAATAACCCCAACAATGACTTCTGGTATTCAAGT-----GAAGAGTCACATGTCTCTCTTAACTCAGAAACTCAAATAG<br>D AATTGTATTTTCAGAAATATTGACAAAATATCATGTATTTACTTTAAGGTTTTTATTCAAGT-----GAAGAGTCACATGATATAAAAATGATTAAACAGGAAATAACTTG | 3/-8<br>(-5)  | 1 | 9: 12398402-9   | IR                                    | Individual 2 (cancer)                         | NC_018920<br>AC_000141           | 5: 25966139-58<br>(20)               | -11.44 | -14.44 | -25.88 |                 |
| Z1776 | P TTCTCCAGTCCAGTCTCGTAGGTGTGTGCTTCCAGCGAGTGTGAGTGGGAGTGGTGGAGCAGGAGCATCTGCTGAGCTGCTCAAAGGGCTCTGGCCCAT<br>R TTCTCCAGTCCAGTCTCGTAGGTGTGTGCTTCCAGCGAGTGTGAGTGGGAGTGGT-----GAGCATCTGCTGAGCTGCTCAAAGGGCTCTGGCCCAT<br>D GGGCGCATGGCCTTGGCCGAGCGGGGCTCTCTCCCTGGAGGTGTGCTGGGAGTGGT-----GAGCATCTGCTGAGCTGCTCAAAGGGCTCTGGCCCAT                             | 5/-10<br>(-5) | 1 | 20: 37279372-81 | 824 bp upstream<br>of <i>ARHGAP40</i> | Individual 2 (blood)                          | AC_000152                        | 17: 81043572-95<br>(24)              | -18.16 | -7.63  | -25.79 |                 |
| Z1381 | P GTCTCTCGCAGAAGACATACAAAAGAGAGAATGAGGTGGCAGGTGGCATGGTGGCGTGCATGGGCAGCAGGGACTCACGGACACTTTGAGGCAGGCAGATGAGAGAA<br>R GTCTCTCGCAGAAGACATACAAAAGAGAGAATGAGGTGGC-AG-----GGTGGCGTGCATGGGCAGCAGGGACTCACGGACACTTTGAGGCAGGCAGATGAGAGAA<br>D GAGGGCTGGCACTAGTTGCCCTGTTCCAGCGGAGGTGGC-AG-----GGTGGCGTGCATGGGCAGCGGGCTGGGTGAGGGAGGCGGGAGCCTCCCCAGTGAAG       | 2/-10<br>(-8) | 1 | 8: 47140066-75  | IR (micro-<br>satellite)              | Individual 2 (cancer)                         | NC_018919<br>AC_000140<br>X68546 | 19: 1833714-31 <sup>f</sup><br>(18)  | -7.93  | -17.45 | -25.38 |                 |
| Z1591 | P ATTCATCATCATTATAAACATTAAAGTATCTGAAATTACACTACCACACATTATTTCACTGATTATATAATACTGGCAAAGGCAGTGCAGGCAATGACTGTGAGCC<br>R ATTCATCATCATTATAAACATTAAAGTATCTGAAATTACACTACC-ACA-----CACTGATTATATAATACTGGCAAAGGCAGTGCAGGCAATGACTGTGAGCC<br>D AAGCAAACCTAATTATTCAAATAGCCCTTACTCTTATACTACC-ACA-----CACTGATTATCCATAAATGCCATAAATTTCTTATTACATGCTGAACAAATA          | 3/-12<br>(-9) | 2 | 11: 99117029-40 | IR                                    | Individual 2 (blood)<br>Individual 3 (cancer) | -                                | 12: 73699906-27 <sup>f</sup><br>(22) | -15.48 | -9.48  | -24.96 |                 |
| Z247  | P TGAATGGCTGTGGACAGGGACTTGGTTGGGGCTTGGTTTTCCCTCTATTAAGTGGTTCATATCAGTACTACTTGGTAAGGCCTCTTGTGAGGGTCCCCAACACCC<br>R TGAATGGCTGTGGACAGGGACTTGGTTGGGGCTTGGTTTTCCCTCTATTAAGTGGG--GA-A--AG--CTACTTGGTAAGGCCTCTTGTGAGGGTCCCCAACACCC<br>D GACCAGGCATGTGAATAAGGTTGGTGTAGTATGGCCCTAAGGTTAAGCAGGTGAGTGGG--GA-A--AG--CTACTTGGTAAGGCCTAGATAAATAAGGCCACATGGGGA  | 5/-12<br>(-7) | 1 | 19: 48118848-59 | IR                                    | Individual 1 (cancer)                         | AC_000151                        | 3: 159800150-74 <sup>f</sup><br>(25) | -5.30  | -19.63 | -24.93 |                 |
| Z200  | P GGGTCTCGCGTCACTTCCGGGAAGCGCGGACTAATACTACTGGGAGACTACAACCTCCAGTGGCCTTCGCGCCATAAGGGGGGGGACAAGCCCTGAGG<br>R GGGTCTCGCGTCACTTCCGGGAAGCGCGGACTAATACTACTGGGAGTTGTAGTCTCCAGTGGCCTTCGCGCCATAAGGGGGGGGACAAGCCCTGAGG<br>D CCCTCAGGCTTGTCCCGCCCTTATGGCGGAAGGCCTACTGGGAGTTGTAGTCTCCAGTGGTGTAGTTCGCGCTTCCCGAAGTGAAGCGAGGACC                                  | 7/-7<br>(0)   | 1 | 16: 28415215-21 | 229 bp upstream<br>of <i>EIF3CL</i>   | Individual 1 (cancer)                         | -                                | 16: 28415206-30 <sup>f</sup><br>(25) | -12.45 | -12.45 | -24.90 | Microinversion. |
| Z96   | P GGTGATAGTTTCTTCTTCCAGCAGATTGAAGATCCATGTTCTGACTGCCAGGTTACTTGTGGCCCACTCAGTCAGGTTGCCATTGCTTGTGGTATCTGCCTT<br>R GGTGATAGTTTCTTCTTCCAGCAGATTGAAGATCCATGTTCTGACTGCCAG-----TGTGTGGCCCACTCAGTCAGGTTGCCATTGCTTGTGGTATCTGCCTT<br>D TACCCAGGTGCAGCCACAGGGCCAGCAAAGGACTCTGGAACCTGCCAG-----TGTGTGGCCCACTCAGTCAGGTTGGGAGGCTGCTCAAGGTTGGCAGGCT                | 6/-12<br>(-6) | 2 | 11: 19083634-45 | IR                                    | Individual 1 (cancer)<br>Individual 1 (blood) | NC_018922<br>AC_000143           | 10: 80961248-65<br>(18)              | -9.06  | -14.74 | -23.80 |                 |





|       |                                                                                                                                                                         |               |   |                  |          |                                               |                        |                                                         |        |        |        |                                                                      |
|-------|-------------------------------------------------------------------------------------------------------------------------------------------------------------------------|---------------|---|------------------|----------|-----------------------------------------------|------------------------|---------------------------------------------------------|--------|--------|--------|----------------------------------------------------------------------|
| Z2131 | P ACACCATACCCTGTCAACTTTCTGGCTTTGATACTGTAGTATCATTATGTA<br>R ACACCATACCCTGTCAACTTTCTGGCTTTGATACTGTAGTATCATTATGTA<br>D AAGACTCAGAAAAAAGAGAAGTAAACAAACAAATACCTATATAATTATGTA | 5/-13<br>(-8) | 1 | 11: 95268428-40  | IR       | Individual 3 (cancer)                         | -                      | 1: 244108431-56<br>(26)                                 | -8.31  | -11.26 | -19.57 |                                                                      |
| Z881  | P ATTTACAGAGAAGCATGGTCTGGGCGCCACAGACAGG<br>R ATTTACAGAGAAGCATGGTCTGGGCGCCACAGACAGG<br>D ATAAGAGAGATCAGAGGGGAAGGAGGCGCTGTAAGTGA                                          | 21/-13<br>(8) | 1 | 10: 70303297-309 | IR       | Individual 2 (cancer)                         | -                      | 12: 85072859-93 <sup>f</sup><br>(35)                    | -3.02  | -16.52 | -19.54 |                                                                      |
| Z2990 | P CTATTCTTAGAAACAACATATAAGGCTGAGACGCGCAGT<br>R CTATTCTTAGAAACAACATATAAGGCTGAGACGCGCAGT<br>D GTACCACAAATTTGAACTCATAAGAACAGAGAATGAT                                       | 6/-15<br>(-9) | 1 | 8: 26072688-702  | PPP2R2A  | Individual 3 (blood)                          | -                      | X: 33511392-408 <sup>f</sup><br>(17)                    | -10.62 | -8.79  | -19.41 |                                                                      |
| Z26   | P CTGGAGGATCAGGGCCCGTGGATCCCGCCAGACCTGCT<br>R CTGGAGGATCAGGGCCCGTGGATCCCGCCAGACCTGCT<br>D TGACACAGTCACCACTGCACCCACACCGCCTCCTGCT                                         | 6/-14<br>(-8) | 1 | 1: 156910895-108 | ARHGEF11 | Individual 1 (cancer)                         | -                      | 16: 3820858-75 <sup>f</sup><br>(18)                     | -4.69  | -14.50 | -19.19 |                                                                      |
| Z1281 | P AGGTGGCTGCTGTAAGTGTGAACAGGAGCTTATATTGG<br>R AGGTGGCTGCTGTAAGTGTGAACAGGAGCTTATATTGG<br>D TTCAGCTCAGCAATGGTGAAGCCTGTGTGGCTCAGGCC                                        | 6/-2<br>(4)   | 1 | 6: 99576960-1    | IR       | Individual 2 (cancer)                         | -                      | 7: 149639109-29 <sup>f</sup><br>7: 153851964-84<br>(21) | -10.13 | -8.91  | -19.04 | Two possible donor segments with the same thermodynamic properties.  |
| Z1696 | P ATAGAGCAGCCTATTTAGAATATCCGGTATAACATTG<br>R ATAGAGCAGCCTATTTAGAATATCCGGTATAACATTG<br>D AATTTTGAACAATCAGTGCAGATGCACGCGCATGACCT                                          | 1/-8<br>(-7)  | 1 | 14: 72625570-7   | RGS6     | Individual 2 (blood)                          | NC_018925<br>AC_000146 | 20: 44002093-107<br>(15)                                | -5.90  | -12.78 | -18.68 |                                                                      |
| Z999  | P GGAGTTGCTCCTGGTTTGTATTCTGCTACTACTGGCG<br>R GGAGTTGCTCCTGGTTTGTATTCTGCTACTACTGGCG<br>D TGACATTCTCTCATTCTGAGATACATACTGACAATAT                                           | 3/-7<br>(-4)  | 1 | 19: 53980690-6   | IR       | Individual 2 (cancer)                         | AC_000151              | 17: 16595357-73 <sup>f</sup><br>(17)                    | -12.19 | -6.48  | -18.67 |                                                                      |
| Z1792 | P AGCTGTGATATTCAGTAAGTATAGGTATTAATACATT<br>R AGCTGTGATATTCAGTAAGTATAGGTATTAATACATT<br>D ATAAGTTCAACTTAAATCAAAAGTCTGAAATACATT                                            | 9/-14<br>(-5) | 2 | 21: 10112431-44  | IR       | Individual 2 (blood)<br>Individual 3 (cancer) | NT_187506              | 20: 62425127-59<br>(33)                                 | -9.57  | -9.03  | -18.60 |                                                                      |
| Z332  | P AATTTTATTGTGTGATAAGAAGAATGAATTTGTAATAG<br>R AATTTTATTGTGTGATAAGAAGAATGAATTTGTAATAG<br>D CTTTCTCGAACCAAGTAAAGAGTTATCTGATGGGTACAT                                       | 2/-8<br>(-6)  | 1 | 3: 118013112-19  | IR       | Individual 1 (cancer)                         | NC_018914              | 3: 28144625-40 <sup>f</sup><br>X: 90634621-36<br>(16)   | -5.56  | -13.00 | -18.56 | Two possible donor molecules with the same thermodynamic properties. |

|       |                                                                                                                                                                                                                                                                                                                                                            |               |   |                                                                                               |                                                      |                                               |                                     |                                      |        |        |        |                                                                                                       |
|-------|------------------------------------------------------------------------------------------------------------------------------------------------------------------------------------------------------------------------------------------------------------------------------------------------------------------------------------------------------------|---------------|---|-----------------------------------------------------------------------------------------------|------------------------------------------------------|-----------------------------------------------|-------------------------------------|--------------------------------------|--------|--------|--------|-------------------------------------------------------------------------------------------------------|
| Z2539 | P AGGTTATGGAATTTGAAGGCTGGGAAAGCATGTGGGAAATCAGAGGCCCTCCCTCGCTGTAGGGAGGAAGTATCCAGGCTGTGGAGAGGACTCTAGA<br>R AGGTTATGGAATTTGAAGGCTGGGAAAGCATGTGGGAAATCAGAGGCCCTCCCTACAGCGAGGGAGGAAGTATCCAGGCTGTGGAGAGGACTCTAGA<br>D GGCTCTAGTGTGCTCATCTCTAGAGTCTCTCCACAGCCTGGATCACTTCTCCCTACAGCGAGGGAGGGCCTCTGATTTCCACATGCTTTCCAGCC                                            | 6/-6<br>(0)   | 1 | 5: 177386541-6                                                                                | IR                                                   | Individual 3 (cancer)                         | -                                   | 5: 177386534-53 <sup>f</sup><br>(20) | -9.20  | -9.20  | -18.40 | Microinversion.                                                                                       |
| Z2200 | P CCTTTGCAAAATTTTAACTCAACTTACCTTGTACTCTTTGCTCTTACTTCAAATCAGAGCAATAAGAAAAGGATTGACCCAGCAACATATTATTAATCAAACACCATATAC<br>R CCTTTGCAAAATTTTAACTCAACTTACCTTGTACTCTTTGCTCTT-----TCAGTGCATAAGAAAAGGATTGACCCAGCAACATATTATTAATCAAACACCATATAC<br>TGAACCTGTTTTAATGTGCTGTGAAGGGTTTTTAAATTTGCTCTT-----TCAGTGCATAAGAAAAGGATTGATATACAGCAAAATAAACATTTGCTCTTTCTAAATGAGTGAATA | 5/-13<br>(-8) | 1 | 14: 29849721-33                                                                               | IR                                                   | Individual 3 (cancer)                         | -                                   | 1: 241857655-73 <sup>f</sup><br>(19) | -8.35  | -9.98  | -18.33 |                                                                                                       |
| Z955  | P ACAGAGAGCCTTCTCCAAGTGGTGCACAGCAGACCCCTGCTGTAGCAGCAAGGAGGAAAAGAACTCACAATTCGAACTCAATCTTTATTGCAGCTGAA<br>R ACAGAGAGCCTTCTCCAAGTGGTGCACAGCAGACCCCTGATCTGT-----GCAGGAGGAAAAGAACTCACAATTCGAACTCAATCTTTATTGCAGCTGAA<br>D CTCCGTAAGATGCTCAAATCCTCCCCAGCCACCCCTGATCTGT-----GCAGGCTTCAGGAGCCAGATATGGATTCTAGGTAGAAACCTGTGTCCCTGATG                                  | 6/-13<br>(-7) | 1 | 17: 12895670-82                                                                               | IR (between<br><i>ELAC2</i> and<br><i>ARHGAP44</i> ) | Individual 2 (cancer)                         | AC_000149                           | 7: 30204762-77 <sup>f</sup><br>(16)  | -12.75 | -5.41  | -18.16 |                                                                                                       |
| Z2501 | P GCGGGAGAGGCTGCTCAGGGCAGCTCAGCCAGGAGCAGAATCAGCTCTCATGAGCCACCAGTCTCCTGACACCTCTGCCCTTTTCCGCCAAAACACCC<br>R GCGGGAGAGGCTGCTCAGGGCAGCTCAGCCAGGAGCAGAATCAGCTCTCATGAG-----TCCTCTGACACCTCTGCCCTTTTCCGCCAAAACACCC<br>D CCACAGAGCCTTCTCCGGAGCCCGCCACCCCGGGCTCTTCTCTCTCTGAG-----TCCTCTGCTGCGTGTGCGGGGCCCGCTCGGGAGGCCTTGG                                            | 5/-13<br>(-8) | 2 | 5: 1280938-50                                                                                 | <i>TERT</i>                                          | Individual 3 (cancer)<br>Individual 3 (blood) | NC_018916<br>AC_000137              | 6: 170451737-51<br>(15)              | -9.82  | -8.07  | -17.89 |                                                                                                       |
| Z1441 | P CCAAATAAATGAAATAGAGTTGAAAAGCAGACAGCAAGCTGTAGGCCTGGCAAGGCTTCAAGAATATTACAGTAACATCTGATATGCAAGTACTATTACAAC<br>R CCAAATAAATGAAATAGAGTTGAAAAGCAGACAGCAAGCTGTAGGCCTGGCAAGGCTTCAAGAATATTACAGTAACATCTGATATGCAAGTACTATTACAAC<br>D CGGGAGCCGTGGAGATGGAGAGTGTGAAACAGC-----C--TACGCCTGGCCGCGCCCTTGGGCTTCTGCTTGCAGACCTGCCTGGAGGTTCTCCCTGGGG                            | 4/-9<br>(-5)  | 1 | 9: 41733375-83<br>9: 61945450-8<br>9: 67643060-8 <sup>f</sup><br>12: 37575264-72 <sup>f</sup> | ncRNA<br>(GenBank<br>XR_432396)                      | Individual 2 (cancer)                         | NC_000009<br>NC_018920<br>AC_000141 | 12: 50369456-71<br>(16)              | -4.78  | -12.83 | -17.61 | The reference sequence contains five identical recipient DNA segments (on two different chromosomes). |
| Z1897 | P AAGCACTCTGAGTAGGAGTTTAAAAGTGGTCTATTGTTCTGATGCTAATTATTACAAATTGTCAGTCTTGACAGCAGATGCTTTGCTTGCTGTTTTCC<br>R AAGCACTCTGAGTAGGAGTTTAAAAGTGGTCTATTGTTCTGATGATAATT-----AAATTGTCAGTCTTGACAGCAGATGCTTTGCTTGCTGTTTTCC1<br>D ACAATATCATGTGGTATGCAGAAGCTAGCTTGCAAAAGCTGATGATAATT-----AAATTGTAATTTTTCTCAAGCTTTGTGAGCCAGTTGTATACACAGCC5                                 | 6/-11<br>(-5) | 2 | 4: 135545821-31                                                                               | IR                                                   | Individual 2 (blood)<br>Individual 3 (cancer) | -                                   | 4: 104333011-29<br>(19)              | -11.86 | -5.92  | -17.60 |                                                                                                       |
| Z895  | P CAACCTTCAGCTTCTGTGGATGCTTTTATAGATATAGTTTCTGCAAGCTTTAACCCTAGGTTCTGAATAGTGTAGTCTTTTTTTTGTAGTATGGTATACTGCATTGCAAAAT<br>R CAACCTTCAGCTTCTGTGGATGCTTTTATAGATATAGTTTCTGCA-----A----TAGGTACTGAATAGTGTAGTCTTTTTTTTGTAGTATGGTATACTGCATTGCAAAAT<br>D TGATAAAAAGAAAATCTGTGTTTCTCAAATGAGGCTATCATCTGCA-----A----TAGGTACTGAATCAAGAGAGAGAGAGAGCAAAGATACATGTATTAATTACTA  | 7/-16<br>(-9) | 1 | 11: 19426100-15                                                                               | <i>NAV2</i>                                          | Individual 2 (cancer)                         | AC_000143                           | 2: 144348530-48 <sup>f</sup><br>(19) | -6.71  | -10.82 | -17.53 |                                                                                                       |
| Z1267 | P GCATGTTTTGAGATCTAAAACAGTTAGTGTCTGTAACTGAAAATAAGTAATAAGGTGTTTTTATATCTCTAAGCCAATATCCAACCTTACACTTTTATTCTACA<br>R GCATGTTTTGAGATCTAAAACAGTTAGTGTCTGTAACTGAAAATAAGTAATAAGGTGTTTT-----TAAGCCAATATCCAACCTTACACTTTTATTCTACA<br>D AGCCCATTTGAACTAGATATTATAGACTTCTGAATTTCTAGGACTATAAGATAACTAGGTGTTTT-----TAAGCCAATTAATTTATGTTAATTTGTCATAGCATC                      | 5/-13<br>(-8) | 1 | 6: 65430901-13                                                                                | <i>EYS</i>                                           | Individual 2 (cancer)                         | NC_018917<br>AC_000138              | X: 116590548-64 <sup>f</sup><br>(19) | -9.44  | -7.99  | -17.43 |                                                                                                       |
| Z2561 | P CAATCTGCTTCTGGCTAGTGTCTTGGGAGTCCATTG-GTCTATATGTGGACAGATTTTCTTAAATGGACTCAGAAGAAAACCTGATCTGAGCTTTC<br>R CAATCTGCTTCTGGCTAGTGTCTTGGGAGTCCATTGAGAAAATCTGTCCACATATAGACC-AAATGGACTCAGAAGAAAACCTGATCTGAGCTTTC<br>D TTTAGAAAGCTCAGATCAGTGTCTTCTGAGTCCATTGAGAAAATCTGTCCACATATAGACC-AAATGGACTCCCAAGGACACTAGCCAGAAAGCAGA                                            | 26/-26<br>(0) | 1 | 6: 18473718-43                                                                                | 8.4 kbp up-<br>stream:<br><i>RNF144B</i>             | Individual 3 (cancer)                         | -                                   | 6: 18473710-51 <sup>f</sup><br>(42)  | -8.67  | -8.67  | -17.34 | Microinversion.                                                                                       |



|       |                                                                                                                                                                                                                                                                                                                                               |               |   |                  |       |                       |                        |                                      |        |        |        |
|-------|-----------------------------------------------------------------------------------------------------------------------------------------------------------------------------------------------------------------------------------------------------------------------------------------------------------------------------------------------|---------------|---|------------------|-------|-----------------------|------------------------|--------------------------------------|--------|--------|--------|
| Z2371 | P AGGGGTGCAGCTAACACCCCTCACAAATGCACAAGACAGCCCTCACAAATAAAAGTCCACACAGGCCAAATGTTAACAGTACTGAGGTTGAGAAACCATGCATTAATGA<br>R AGGGGTGCAGCTAACACCCCTCACAAATGCACAAGACAGCCCTCACAAATAAAAG-----GCC-AAATGTTAACAGTACTGAGGTTGAGAAACCATGCATTAATGA<br>D TCTTGAACCAAGTTTTCAACAAGCACAGTATCATGTTCCCTCAAGGAGAAAAG-----GCC-AAATGTTTCAGAGTAATACCTCTGCCACCTCTTCATTGTTCA | 4/-13<br>(-9) | 1 | 2: 218383163-75  | IR    | Individual 3 (cancer) | -                      | 4: 22347255-71<br>(17)               | -4.29  | -12.87 | -17.16 |
| Z2707 | P AGCCAGCAACTGCAGTCTAGTACTGGGAGGCTGAGGTGGGAGGATCCTCTGAGCGTAGGAGACTGAGGCTGCAGTG-AGCTGTGATTGGCAACACTGCACCTCCAGCC<br>R AGCCAGCAACTGCAGTCTAGTACTGGGAGGCTGAGGTGGGAGGATCCTCTGAGCGTAGGAGACT-----GTGGAGCTGTGATTGGCAACACTGCACCTCCAGCC<br>D TGGACTGAAAAGACCAGGTTGGGAGAGGGAGGAGAGATCTTCGCCCGCCCTTTCGT-GGAGAC-----GTGGAGCTGTAGCCTCGTGTCTCACTGCCTGTCTC     | 4/-13<br>(-9) | 1 | 12: 65121148-60  | GNS   | Individual 3 (blood)  | AC_000144              | 16: 72986546-63 <sup>f</sup><br>(18) | -10.31 | -6.48  | -16.79 |
| Z2523 | P AATCTAAGTTTCTTTTGTGTTGTTTTAAAGGAAGGATGCAGTTCCTCTGTTAGGATTTTGAATGGTCCCTCTGGCCCTGTCTCGGAAATGAACATAAAGTGGATT<br>R AATCTAAGTTTCTTTTGTGTTGTTTTAAAGGAAGGAT-----TCTCCGTTAGGATTTTGAATGGTCCCTCTGGCCCTGTCTCGGAAATGAACATAAAGTGGATT<br>D CCATATGGTGGTTTTGGAGTGAGAAAAGGAAGGA-----TCTCCGTTAG-ATTAGAAAATAAATAACAATGTGTTCTAAAACCTTGTATCAATGATAAGACT         | 5/-11<br>(-6) | 1 | 5: 111142435-45  | NREP  | Individual 3 (cancer) | -                      | 12: 18541036-58 <sup>f</sup><br>(23) | -5.61  | -11.17 | -16.78 |
| Z674  | P CCTCTCTGTGACAGCTCCAGCAGGAGCAGAGTCTCCCTGGAAGCCGGGAGTCCACAGTCTCCTGCAATGAAGCTCTTTGTCTGCGTCCCTCTAACAGCGGCAGT<br>R CCTCTCTGTGACAGCTCCAGCAGGAGCAGAGTCTCCCTGGAAGCCGGGAGTCCACAGT-----CTGCCGTAAGCTCTTTGTCTGCGTCCCTCTAACAGCGGCAGT<br>D TCAAGTATCCTCCACCTCGGCCCTCCCAAGTGTGAGATTACAGGTGTGAGTCC-----CTGCCGTAAGCTGCTATGAATATTTAGTAGGAGACCTTGTGT           | 5/-14<br>(-9) | 1 | 22: 49706499-512 | IR    | Individual 1 (blood)  | NC_018933<br>AC_000154 | 20: 35895099-116<br>(18)             | -6.46  | -10.26 | -16.72 |
| Z2609 | P TTTGTACCCATTAATCAAATATTTTTATCTCCCTTCCAGCCTCTGGTAGCTACCAATCTACTCTCTATCTTCATGAGATCCAGGTTTTAAGCTCCACATGTG<br>R TTTGTACCCATTAATCAAATATTTTTATCTCCCTTCCAGCCTCTGGTAGCTACCAATCT-----CTATCTCCATGAGATCCAGGTTTTAAGCTCCACATGTG<br>D GCTCCCTCAGCTTCTGGTACTGCAGCATTCTTTGATTTGTGGCCACCTCATTCCAATCT-----CTATCTCCATGGTAACGTTATTACCTTCTCTCTGCGCC              | 0/-5<br>(-5)  | 1 | X: 3739716-20    | IR    | Individual 3 (cancer) | AC207444<br>AK125688   | 12: 81231231-48 <sup>f</sup><br>(18) | -7.11  | -9.48  | -16.59 |
| Z209  | P AAAAACCCGTGTCTGAAATCAACATCCTCAGGGTCTGGAAAAATAGTATCGACAGAAAAGTGTGAAATATGAAATAGAAAACAAAACAAAACCTCTACGACACC<br>R AAAAACCCGTGTCTGAAATCAACATCCTCAGGGTCTGG-----A-TGTCGACAGAAAAGTGTGAAATATGAAATAGAAAACAAAACAAAACCTCTACGACACC<br>D CGGGACGTTGGTGACCGTTAGACTTGTCTGGGGTCTGG-----A-TGTCGACACATGGTGTGCTTGGGGCCAGAGTGCAGGAAATGGAAACTGGGTCTG              | 3/-12<br>(-9) | 1 | 17: 3587922-33   | P2RX5 | Individual 1 (cancer) | AF168787               | 19: 17817487-502<br>(16)             | -11.23 | -5.23  | -16.46 |
| Z2466 | P GTAGAGATAAATATCACGTAGCATATGCTAAGGTGATTTGCAAGATCTATCTATCTTAAAGACTGTAAGTCTAATTTAATAGCAATACAGACATTTAGT<br>R GTAGAGATAAATATCACGTAGCATATGCTAAGGTGATTTGCAAGAT-----TCTATCTTAAAGACTGTAAGTCTAATTTAATAGCAATACAGACATTTAGT<br>D AAATACCATAAACAATTTTTTGAAGTCTGTTGATTTGCAAGAT-----TCTATCTTAAAGACTGTAAGTCTAATTTAATAGCAATACAGACATTTAGT                      | 6/-11<br>(-5) | 1 | 4: 52913027-37   | IR    | Individual 3 (cancer) | AC_000136              | 9: 8643070-87 <sup>f</sup><br>(18)   | -12.08 | -4.17  | -16.25 |
| Z582  | P TCTGTGCTGGCTATTTCAATTTAACAATAATG---T---CCTCCTGGTTCATCCAGGTTGTCAAAATGACAGGATTTCTCTTTTTGAGGCTGAATAGTA<br>R TCTGTGCTGGCTATTTCAATTTAACAATAATG---T---CCTCCTGGTTCATCCAGGTTGTCAAAATGACAGGATTTCTCTTTTTGAGGCTGAATAGTA<br>D AGAATTCAATAAATGCTTTTGAATTAATG---T---CCTCCTAGATGGAATCTAGATGGGTTCCACCACAGTAAATAATACACTATCTCTTACCA                           | 6/-1<br>(5)   | 1 | 10: 129275154    | IR    | Individual 1 (blood)  | NC_018921<br>AC_000142 | 18: 21902793-813<br>(21)             | -9.33  | -6.77  | -16.10 |
| Z2960 | P TTCAGTTATTTTCCCATTTTCAGAGTGGAGGAGTTCAAGAATGAACATGGCCAAATAGCCAAAGTCTCCAGAACAGGAGGATAGATCCGGAGAGAAATCTTTGG<br>R TTCAGTTATTTTCCCATTTTCAGAGTGGAGGAGTTCAAGAATGAACATGGCCAAATAG-----CCAGAACAGGAGGATAGATCCGGAGAGAAATCTTTGG<br>D GACCACTGCTTCTGTTCTAAATTTCTTCAGGAGCCTGGAGAAAGTATG-CCAAACAG-----CCAGAACATTAGCATTCTTTCTGTTAACCCCAAGTTT                 | 4/-13<br>(-9) | 1 | 7: 131481377-89  | IR    | Individual 3 (blood)  | -                      | 10: 61389784-801<br>(18)             | -8.22  | -7.84  | -16.06 |

|       |                                                                                                                                                                                                                                                                                                                                           |               |   |                   |                                            |                                              |                        |                                       |       |        |        |                                                                       |
|-------|-------------------------------------------------------------------------------------------------------------------------------------------------------------------------------------------------------------------------------------------------------------------------------------------------------------------------------------------|---------------|---|-------------------|--------------------------------------------|----------------------------------------------|------------------------|---------------------------------------|-------|--------|--------|-----------------------------------------------------------------------|
| Z2099 | P ATTTTTCAGACCTGTCACCTTGGCGGCGGCAGTGACACA-CTGTGGGAACGGGGA---CCACACACTTAAGGAGTTTTTCATAAATAGCTTTATTAATAGT<br>R ATTTTTCAGACCTGTCACCTTGGCGGCGGCAGTGACAGGCTGAAAATCAGCAATCCTAAACAAATTAAGGAGTTTTTCATAAATAGCTTTATTAATAGT<br>D GTTCCACAGTGTGTCACCTGCCCGCCCAAGTGACAGGCTGAAAATCAGCAATCCTAAACAAATTAAGGCATCAATTCCTCCTCCCAACCAAGGCC                     | 29/-25<br>(4) | 1 | 10: 118596593-617 | <i>HSPA12A</i>                             | Individual 3 (cancer)                        | -                      | 10: 118596534-75 <sup>f</sup><br>(42) | -7.68 | -8.36  | -16.04 | Donor DNA locus very close to recombinant site.                       |
| Z1818 | P TTTAAGGTACAAACAGCACTTCATACAATATCTCATGAGTATTAATAGTACATTACAGGGAAGATTTTCACGCTGTGAGTCTTGTCTAACATATCCAGTTATTACAG<br>R TTTAAGGTACAAACAGCACTTCATACAATATCTCATGAGTATTAATAGTAC-----GAAGACTTTCACGCTGTGAGTCTTGTCTAACATATCCAGTTATTACAG<br>D TGAGGAGAGTGGGATCTTAGCTGAGACAGTGAATAAGTAAACATAGTAC-----GAAGACTTTCACGAGCAGCTCACTAAGACAGAAATATCTTTCCTCT     | 6/-14<br>(-8) | 1 | 4: 3174498-511    | <i>HTT</i>                                 | Individual 2 (blood)                         | -                      | 1: 204934783-800<br>(18)              | -4.33 | -11.66 | -15.99 |                                                                       |
| Z2901 | P GGAGAGAAGAGTCAAAACAATAAATCAGAA-----GAGGAGACATTATACTAATGCAACAGAAATTAAGATCATAAGAGATTTCTATTTAAGAAAGT<br>R GGAGAGAAGAGTCAAAACAATAAATCAGAAATAGAAAGGAGACATTATACTAATGCAACAGAAATTAAGATCATAAGAGATTTCTATTTAAGAAAGT<br>D ATAAGAGAGTATCAAGGGAGAAATCAGAAATAGAAAGGAGACAGTTTGAACAATGCCTGTGGCTTACATCCCTAGAGTAGACCTGAAG                                  | 6/0<br>(6)    | 1 | 5: 11937895/6     | IR                                         | Individual 3 (blood)                         | NC_018916              | 3: 183761254-74 <sup>f</sup><br>(21)  | -7.94 | -7.92  | -15.86 |                                                                       |
| Z781  | P TCTGCCAACCTACTTTTGGTTCACACTCCCTCCCGCAGCAGAAATACCAATACACAGTTACCTTCTTTGTCTGTGTACATCCACACCAAGAGAGTGTTC<br>R TCTGCCAACCTACTTTTGGTTCACACTCCCTCCCGCAGCAGAAATACCAATACACAGTTACCTT-----GTCTAAGTGTACATCCACACCAAGAGAGTGTTC<br>D TATCACATGAATTCATCTACTGATCTCCAATTCAAATTCAGGACTATAGAGTCTGCTTACCTT-----GTCTAAGTGTACATCTCCTTCTTCTACACTGATA             | 5/-10<br>(-5) | 2 | 9: 104864723      | IR                                         | Individual 1 (blood)<br>Individual 3 (blood) | NC_018920              | 12: 13511306-22<br>(17)               | -4.11 | -11.72 | -15.83 |                                                                       |
| Z2600 | P TCCCTGACCCCTTCTAAAGCTTCTTCTTAGCTTCTGCTGCCCTCCAGGTAAGCACTCCACAGC-----CTGTGGAAGCTCTGTGGGTATAGTCTGTCT<br>R TCCCTGACCCCTTCTAAAGCTTCTTCTTAGCTTCTGCTGCCCTCCAGGTAAGCACTCCACAGCACAGAGCTGTGGAAGCTCTGTGGGTATAGTCTGTCT<br>D ATTTGTTGTGATGTGCTGCTGTTGACTGATTGCCATGTTGTATGCTGTGTAATCCTCACAGCACAGAGCTGTGGAAGCTCTGTGGGTATAGTCTGTCT                     | 6/0<br>(6)    | 1 | 8: 10704458/9     | 7.1 kbp up-<br>stream: <i>PINX1</i>        | Individual 3 (cancer)                        | NC_018919              | 3: 51594027-45<br>(19)                | -7.42 | -8.31  | -15.73 |                                                                       |
| Z249  | P AGAGGGAGAAGGGGACGGGAGGCATTCCGGCTTCTGTCTTAGGCTTACTGCTCTGCTACCTGATGGAGCAGAGTCCCCACCTGCCCTTATCGGA<br>R AGAGGGAGAAGGGGACGGGAGGCATTCCGGCTTCTGTCTTAGGCTTACTGCTCTGCTACCTGATGGAGCAGAGTCCCCACCTGCCCTTATCGGA<br>D GTGCTGTGTCGGGCTAACGCTGCTTTTTCGATAAGGGGAGGTTGGGGACTGCTGCTT-----AGCAGCAGGTCAGTCAAGGCCCTAAGACAGGA                                  | 9/-12<br>(-3) | 1 | 19: 55864831-42   | 216 bp down-<br>stream of<br><i>COX6B1</i> | Individual 1 (cancer)                        | -                      | 19: 55864826-47 <sup>f</sup><br>(22)  | -4.69 | -10.97 | -15.66 | Microinversion (misannealed at left MH, resulting in a net deletion). |
| Z1302 | P ACAAAAATAAATAAAGAAATGAGCAAAAGCTTACCTGACGATGAGACACCAAGCAGTGCACAAAATATTCAAATTTTGGTATCCCAAGTCAAAGAGATAATA<br>R ACAAAAATAAATAAAGAAATGAGCAAAAGCTTACCTGACGATGAGACACCAAGCAGTGCACAAAATATTCAAATTTTGGTATCCCAAGTCAAAGAGATAATA<br>D GAAAAGCAAGTTCATTGCCTGCTTTTGGAGCATCTTTCTAAAAATACACCA-----TGACAAA-TATTGGAGTTGGTAATTCATGGGGTAAACACCCCAAGGA         | 0/-4<br>(-4)  | 1 | 6: 159760516-9    | IR                                         | Individual 2 (cancer)                        | AC_000138              | 14: 81007869-85 <sup>f</sup><br>(17)  | -6.61 | -15.64 | -15.64 |                                                                       |
| Z1644 | P TTTCTGTATATGTGCACTACATTCATTTTTTGGTGTGACAAAGTGTATTAAGGACCAAAACATTCACCTTGTCTAATGAAAGTTGACATTTCTAGTCAATCAATA<br>R TTTCTGTATATGTGCACTACATTCATTTTTTGGTGTGACAAAGTGTATTAAGGACCAAAACATTCACCTTGTCTAATGAAAGTTGACATTTCTAGTCAATCAATA<br>D GTCAGTATTTTCATCGATATCTCATGTCATGGCCCTCCCTCTTCAAGTGTAT-----AAACATTCACCTTGTCTAATGAAAGTTGACATTTCTAGTCAATCAATA | 5/-13<br>(-8) | 1 | 12: 58482412-24   | IR                                         | Individual 2 (blood)                         | NC_018923<br>AC_000144 | 13: 50490879-96 <sup>f</sup><br>(18)  | -9.36 | -6.24  | -15.60 |                                                                       |
| Z924  | P ATGAGCAGGACAGCTGATGTGTGGAATGCATATATCAAAAAAGTTTCAACAGACTGTGTATGTTTAAACAGGATTCATATTTCTAAAATACCAACTGTAAAAT<br>R ATGAGCAGGACAGCTGATGTGTGGAATGCATATATCAAAAAAGTTT-----GATGTGTATGTTTAAACAGGATTCATATTTCTAAAATACCAACTGTAAAAT<br>D ATTTCTTTGGCATTTTCTGACTGTGGCTTTTGAATGTTGAGT-----GATGTGTG-TGTTCTGTTTTCAGCTTGGAGAACGCCATCTCTGGAAGAAGCC            | 3/-8<br>(-5)  | 1 | 12: 81835505-12   | <i>PFFIA2</i>                              | Individual 2 (cancer)                        | -                      | 11: 9549050-66<br>(17)                | -4.59 | -10.86 | -15.45 |                                                                       |

|       |   |                                                                                                                                         |       |   |                  |               |                       |           |                               |        |        |        |
|-------|---|-----------------------------------------------------------------------------------------------------------------------------------------|-------|---|------------------|---------------|-----------------------|-----------|-------------------------------|--------|--------|--------|
| Z1305 | P | TTCCGGGATGAGAAGGAGCACCTGGCCACAGCTGCACAATGGACGCCTGCCTGG <b>AAGGTCTTT</b> GAATGTT <b>ATGA</b> AT <b>ATGA</b> CTACTGAGAGACAGAAGCCAACCAT    | 7/-15 | 1 | 6: 166060276-90  | <i>PDE10A</i> | Individual 2 (cancer) | NC_018917 | 18: 4995923-42 <sup>f</sup>   | -6.55  | -8.90  | -15.45 |
|       | R | TTCCGGGATGAGAAGGAGCACCTGGCCACAGCTGCACAATGGACGCCTGCCTGG <b>AAGGTCTTT</b> ----- <b>ATGA</b> ACAT <b>ATGA</b> CTACTGAGAGACAGAAGCCAACCAT    | (-8)  |   |                  |               |                       |           | (20)                          |        |        |        |
|       | D | GGAGATCTCAGAGTATATATTGGGTAAATATAATCATAAATCTTGGGAATAATGAA <b>AAGGACTTT</b> ----- <b>ATGA</b> ACAT <b>ATGA</b> ATAATCAAGAAATGGCATGGGGATCC |       |   |                  |               |                       |           |                               |        |        |        |
| Z279  | P | AAGTCATTCTCCAACAGGAATGATACCCATTTACATGTATAACTAACTCTGG <b>GAAGGGG</b> AATACCC <b>AAACAT</b> TTTCGAGAGCTGTTGATGTCATGCCTG                   | 5/-7  | 1 | 2: 215743896-102 | IR            | Individual 1 (cancer) | NC_018913 | 11: 26541918-37               | -10.94 | -4.45  | -15.39 |
|       | R | AAGTCATTCTCCAACAGGAATGATACCCATTTACATGTATAACTAACTCTGG <b>GAAGGGG</b> GGGA-- <b>AAACAT</b> TTTCGAGAGCTGTTGATGTCATGCCTG                    | (-2)  |   |                  |               |                       | AC_000134 | (20)                          |        |        |        |
|       | D | ACCTGGTAGGAATGCATGTAAAAGAAGAGTTCTACTATATCCAAGGAAAAAAT <b>GA</b> AAAGGGGGGA-- <b>AAACAT</b> GGAAATGTGCAGTTACTATCCCTTTT                   |       |   |                  |               |                       |           |                               |        |        |        |
| Z1933 | P | GAAGAGGCTGTCAAGGGGACTTCTTCCAAGTGGGCCAAAGACTCCATCAGGTC <b>GAGTAGTGAC</b> ATGGAA <b>ATCACAG</b> AGCAGGTGGCTCCAAGGATCTGTCCCT               | 5/-11 | 1 | 7: 157739904-14  | <i>PTPRN2</i> | Individual 2 (blood)  | NC_018918 | 13: 92315089-105 <sup>f</sup> | -8.37  | -6.95  | -15.32 |
|       | R | GAAGAGGCTGTCAAGGGGACTTCTTCCAAGTGGGCCAAAGACTCCATCAGGTC <b>GAGTAATGAC</b> ----- <b>ATCACAG</b> AGCAGGTGGCTCCAAGGATCTGTCCCT                | (-6)  |   |                  |               |                       |           | (17)                          |        |        |        |
|       | D | ATAGCAGCTGTAGCCAAGCTGTGTTTGAAAGTCATTGGATGACCTAAGCTTGAAG <b>GAGTAATGAC</b> ----- <b>ATCACAG</b> GTAGTATATGTTTGGAGAGAGTGCCA               |       |   |                  |               |                       |           |                               |        |        |        |
| Z2697 | P | TAACAGGCTTGGTGTGTGCACCTGTAGTCC <b>GCTAC</b> TGGGGCAATA <b>CCCTACAA</b> ATGACTCTGTAACCTTATTAGGGGCAGTAGAAAATGGTGTACTCTCT                  | 5/-12 | 1 | 11: 119030088-99 | <i>ABCG4</i>  | Individual 3 (blood)  | NC_018922 | 13: 36838429-49               | -3.95  | -11.32 | -15.27 |
|       | R | TAACAGGCTTGGTGTGTGCACCTGTAGTCC <b>GCTAC</b> AGAGT----- <b>CCCTACAA</b> ATGACTCTGTAACCTTATTAGGGGCAGTAGAAAATGGTGTACTCTCT                  | (-7)  |   |                  |               |                       | AC_000143 | (21)                          |        |        |        |
|       | D | TTCAGAAGTTTTTAAAAGAAGTTGATCAACATGG <b>GCTAC</b> AGAGT----- <b>CCCTACAA</b> - <b>TGAGA</b> AGGATTTAGATGGAAAAGTAGAGTAGAAAGCTATATACTG      |       |   |                  |               |                       |           |                               |        |        |        |
| Z840  | P | TTTTCAAGTGTATGTTGTTAAT <b>TACAG</b> CTACCAT <b>ATTGTGCAGTAGAAC</b> CTTGAATTTATTACTCCTGTTTGGCTGAAATTTGTGTTCTTTGACCAATATCT                | 6/-13 | 1 | 1: 57979428-40   | IR            | Individual 2 (cancer) | -         | 3: 69981794-812               | -3.26  | -11.92 | -15.18 |
|       | R | TTTTCAAGTGTATGTTGTTAAT <b>TACAG</b> ----- <b>ATTGTGCAGTAGAAC</b> CTTGAATTTATTACTCCTGTTTGGCTGAAATTTGTGTTCTTTGACCAATATCT                  | (-7)  |   |                  |               |                       |           | (19)                          |        |        |        |
|       | D | TTACTTTTGTAAAGGACAGCTTT <b>TACAG</b> ----- <b>ATTGTGCAGTA</b> - <b>AAC</b> AAGATTATATGTCCAAGGATATATGTTCTGGCTTTGTTTCTTTTGTGGTAAT         |       |   |                  |               |                       |           |                               |        |        |        |
| Z2802 | P | AACAAGGCTTATAAAATAAATAGGGTGATGATGAGAATTTAAAATGAA <b>CAGGAAT</b> TACGGCAAG <b>ATGAGGAA</b> ACGAGTCAAACTGTTTTTCAGAAGGAATAAGC              | 4/-9  | 1 | 2: 205790289-97  | <i>PARD3B</i> | Individual 3 (blood)  | AC_000134 | 9: 101848598-616              | -7.11  | -8.07  | -15.18 |
|       | R | AACAAGGCTTATAAAATAAATAGGGTGATGATGAGAATTTAAAATGAA <b>CAGGAAT</b> --CG--TA- <b>ATGAGGAA</b> ACGAGTCAAACTGTTTTTCAGAAGGAATAAGC              | (-5)  |   |                  |               |                       |           | (19)                          |        |        |        |
|       | D | TTGTTTTTGTCTTCTTCCCTAACTTAAACAAGAACGACGAAGTTGGTGG <b>CAGGAAT</b> --CG--TA- <b>ATGAGGAA</b> GTGAGCATTCTCTCTTTGTTGGAGAGTGTACT             |       |   |                  |               |                       |           |                               |        |        |        |

Total 94 different SPDIR events identified.

<sup>a</sup> P: ancestral/parental DNA sequence; R: recombinant (microindel-containing) DNA sequence; D: donor DNA sequence of segment used for double IR; bold pink: simple or extended microhomologies as determined by  $\Delta G^0_{\min}$ ; highlighted yellow: illegitimate recombination sites.

<sup>b</sup> Nucleotides inserted/nucleotides deleted. <sup>c</sup> Nucleotide positions, including all MH annealing segments as determined by  $\Delta G^0_{\min}$ , in GRCh37/hg19.

<sup>d</sup> Simple or extended microhomology. <sup>e</sup> Intergenic region. <sup>f</sup> Reverse complement. <sup>g</sup> The donor patch aligned is from chromosome 15 (chromosome 3 not shown). <sup>h</sup> The two donor patch DNA segments from chromosome 7 are identical for the aligned segment. <sup>i</sup> The donor patch aligned is from chromosome 3 (not shown for the X chromosome).
